# Supplementary material
Source: publisher site journal article supplement (https://www.dovepress.com/article/254946)
Supplement: Supplementary file 1 [file get_supplementary_file.php]

| **Appendix 1:**  Characteristics of extracted studies with consideration to type of study was conducted and country | | | | | | | | | | |
| --- | --- | --- | --- | --- | --- | --- | --- | --- | --- | --- |
|  | Study | Geographic Region | | Methods | Quality Appraisal | Study Designs | | | | |
| Qualitative | Quantitative | Mixed Method | Review | Letter / Perspective |
| 1 | Gilbert Abotisem Abiiro et al, (2015), 1 | global | | Synthesis of conceptual literature and global debates |  | + |  |  |  |  |
| 2 | Gilbert Abotisem Abiiro Et al, (2014), 2 | Malawi | | FGD &  Interview |  | + |  |  |  |  |
| 3 | Gilbert Abotisem Abiiro Et al, (2013), 3 | Ghana | | Interviews,  (Fgds),  Review Of  Media Reports |  | + |  |  |  |  |
| 4 | Alayne M Adams  et al, (2013), 4 | Bangladesh | | Review |  |  |  |  | + |  |
| 5 | Esther F. Adebayo  Et al (2015), 5 | Low-income and middle-income countries | | Narrative synthesis |  |  |  |  | + |  |
| 6 | Ximena Aguilera et al, (2014), 6 | Chile | | Narrative synthesis |  |  |  |  | + |  |
| 7 | Shakil Ahmed  Et al, (2013), 7 | Lao PDR | | Interview  Semi Structured Questionnaire |  | + |  |  |  |  |
| 8 | AbebeAlebachew  et al, (2014). 8 | Ethiopia | | Surveys |  |  | + |  |  |  |
| 9 | Eugenia Amporfu  )2013), 9 | Ghana  (Accra,Kumasi) | | The kakwani index method as well as graphical analysis  Was used to study the vertical equity. Horizontal inequity was measured through the effect of the premium on  Redistribution of ability to pay of members. |  |  | + |  |  |  |
| 10 | Gerard F. Anderson  (1989). 10 | korea | | Review |  |  |  |  | + |  |
| 11 | John E. Ataguba  Et al, (2014), 11 | South Africa | | Narrative synthesis |  |  |  |  | + |  |
| 12 | RifatAtun et al,  (2013), 12 | Turkey | | Review |  |  |  |  | + |  |
| 13 | RifatAtun et al,  (2015), 13 | Argentina  Brazil  Chile  Colombia  Costa Rica  Cuba Mexico  Peru Uruguay  Venezuela | | --- |  |  |  | + |  |  |
| 14 | Y Balarajan  et al, (2011), 14 | India | | Review |  |  |  |  | + |  |
| 15 | Sara Bennett  et al, (2010), 15 | Cross country | | Perspective |  |  |  |  |  | + |
| 16 | Linda J. Blumberg  Et al, (2006), 16 | Massachusetts | | Review |  |  |  |  | + |  |
| 17 | Ties Boerma  Et al, (2014), 17 | Cross country | | Narrative synthesis |  |  |  |  | + |  |
| 18 | Ties Boerma  Et al, (2014), 18 | Cross country | | Narrative synthesis |  |  |  |  | + |  |
| 19 | Karl Blanchet  Et al, (2012), 19 | Developing countries | | Systematic review |  |  |  |  | + |  |
| 20 | Elio Borgonovi et al,  (2013). 20 | Italy | | Debate |  | + |  |  |  |  |
| 21 | Caryn Bredenkamp  et al, (2015), 21 | USA | | literature review |  |  |  |  | + |  |
| 22 | James Campbell  Et al, (2013), 22 | Cross country | | Case studies |  |  | + |  |  |  |
| 23 | Silvia Helena De Bortoli Cassiani  Et al, (2014), 23 | Latin America | | Through a group consensus method |  |  |  |  | + |  |
| 24 | Jane Chuma  Et al, (2012), 24 | Kenya | | Cross-sectional |  |  | + |  |  |  |
| 25 | Jane Chuma  Et al, (2011), 25 | Kenya | | Review |  |  |  |  | + |  |
| 26 | Gloria Coe Joy de Beyer (2014), 26 | USA | | ------- |  |  |  |  |  | + |
| 27 | Giorgio Cometto  Et al, (2013), 27 | Switzerland | | Round table |  | + |  |  |  |  |
| 28 | Rick Curtis Ed Neuschler (2009), 28 | California | | Review |  |  |  |  | + |  |
| 29 | S Thomson, Et al,  (2014), 29 | 29  European countries  UK | | Cross-Sectional |  |  | + |  |  |  |
| 30 | Karen Davis  (2001), 30 | United States | | Review |  |  |  |  | + |  |
| 31 | Luiz Odorico Monteiro de Andrade  Et al, (2015), 31 | Latin American countries | | Case Studies |  |  |  |  | + |  |
| 32 | Narayanan Devadasan  Et al, (2014), 32 | India | | Narrative synthesis |  |  |  |  | + |  |
| 33 | Bradley Chen  (2012), 33 | Lebanon | | In-depth  Interviews  Household survey |  |  |  | + |  |  |
| 34 | Antonio Durana  Et al, (2014), 34 | India | | Case study |  |  |  |  | + |  |
| 35 | Giovanni Fattore  Et al, (2013), 35 | Italy | | Cultural theory |  | + |  |  |  |  |
| 36 | Francesca Ferré  Et al, (2014), 36 | Italy | | Health system review |  |  |  |  | + |  |
| 37 | Julio Frenk  (2015), 37 | Latin America | | ----- |  |  |  |  |  |  |
| 38 | Lucy Gilson  Et al, (2012), 38 | South Africa and  Tanzania, | | Cross-national  Stakeholder analysis |  | + |  |  |  |  |
| 39 | Veloshnee Govender  Et al, (2013), 39 | South Africa | | Interview |  |  |  | + |  |  |
| 40 | Ramon Lorenzo Luis R. Guinto, Et al, (2015), 40 | Indonesia  Malaysia  Philippines  Singapore  Thailand | | Scoping review |  |  |  |  | + |  |
| 41 | Juan Pablo Gutiérrez  Et al, (2014), 41 | Mexico | | Survey |  |  | + |  |  |  |
| 42 | Bui T. T. Ha1  Et al, (2014), 42 | Vietnam | | In-depth interviews,  Fgd  Expert consultancy |  | + |  |  |  |  |
| 43 | Bronwyn Harrisa  Et al, (2011), 43 | South Africa | | Survey |  |  | + |  |  |  |
| 44 | Hideki Higashi  Et al, (2011), 44 | case study  Vietnam | | Perspective |  |  |  |  |  | + |
| 45 | Tanvir Huda  Et al, (2014), 45 | Bangladesh | | Collection review |  |  |  |  | + |  |
| 46 | Hossein Ibrahimipour  Et al,(2011), 46 | IRAN | | Interview |  | + |  |  |  |  |
| 47 | Rada Hussein (2015), 47 | Cross country | | Synthesize review |  |  |  |  | + |  |
| 48 | Bart Jacobs  Et al, (2012), 48 | low-income Asian countries | | Review |  |  |  |  | + |  |
| 49 | Ashok Kumar Jindal  (2014), 49 | India | | Review |  |  |  |  | + |  |
| 50 | Felicia Marie Knaul  Et al, (2005), 50 | Mexico | | Review |  |  |  |  | + |  |
| 51 | Yasuki KOBAYASHI  (2009), 51 | Japan | | Review |  |  |  |  | + |  |
| 52 | A K Shiva Kumar  Et al, (2011), 52 | India | | Report |  |  | + |  |  |  |
| 53 | Soonman Kwon  (2009), 53 | South Korea | | Review |  |  |  |  | + |  |
| 54 | Gina Lagomarsino  Et al, (2012), 54 | Cross country | | Review |  |  |  |  | + |  |
| 55 | Soonman Kwon  (2011), 55 | Cross country | | Review |  |  |  |  | + |  |
| 56 | Anthony Leegwater  Et al, (2015), 56 | 103 country | | Review |  |  | + |  |  |  |
| 57 | Hai Chao Lei, (2008), 57 | China | | Case study |  |  |  |  | + |  |
| 58 | Cheng Li, Et al, (2011), 58 | China | | Literature  Review And Publicly Available Data |  |  |  |  | + |  |
| 59 | Ngan Do Juhwan Oh  Et al, (2014), 59 | Vietnam | | Comparative Study |  |  |  |  |  | + |
| 60 | Ahmad BaratiMarnani  Et al, (2012), 60 | IRAN | | Structured interviews |  | + |  |  |  |  |
| 61 | Robert Marten  Et al, (2014), 61 | Brazil  Russia  India  China  South  Africa | | Review |  |  |  |  | + |  |
| 62 | Di McIntyre  Et al, (2012), 62 | South Africa | | Review  Interview |  |  |  | + |  |  |
| 63 | Diane McIntyre  Et al, (2008), 63 | Ghana  South Africa  United Republic of Tanzania | | Review |  |  |  |  | + |  |
| 64 | Di McIntyre  Et al, (2013), 64 | Costa Rica  Georgi  India  Malawi  Nigeria  Tanzania  Thailand | | From Case  Studies In This Thematic Series |  |  |  |  | + |  |
| 65 | Martin McKee  Et al, (2012), 65 | UK | | Review |  |  |  | + |  |  |
| 66 | Anne Mills  Et al, (2012), 66 | Ghana  South Africa  Tanzania | | Review |  |  |  |  | + |  |
| 67 | Anne Mills  Et al, (2012), 67 | Ghana,  South Africa  Tanzania | | Secondary data  Fgd  In-depth interviews |  |  |  | + |  |  |
| 68 | Marie Ng  Et al, (2014), 68 | Cross country | | Review  Biomarkers  Cohort  Registration |  |  |  | + |  |  |
| 69 | Médard Nyandekwe  Et al, (2014), 69 | Rwanda | | Retrospective review |  |  |  |  | + |  |
| 70 | Frank Nyonator  Et al, (2014), 70 | Ghana | | Review |  |  |  |  | + |  |
| 71 | Thomas S. O’Connell  Et al, (2015), 71 | Cross country | | Review |  |  |  | + |  |  |
| 72 | Juliet S. Okoroh  Et al,  (2015), 72 | Cross country | | Systematic review |  |  |  |  | + |  |
| 73 | Kristine HusøyOnarheim  Et al, (2015), 73 | Ethiopia | | Survey |  |  | + |  |  |  |
| 74 | Vikram Patel  Et al, (2015), 74 | India | | Review |  |  |  |  | + |  |
| 75 | Meng Qingyue  Et al, (2013), 75 | China | | Case study |  |  |  |  | + |  |
| 76 | Jonathan Quick et al,  (2014), 76 | agenda | | ---- |  |  |  |  |  |  |
| 77 | Krishna D Rao  Et al, (2014), 77 | Brazil, Russian Federation  India  China South Africa | | Review |  |  |  |  | + |  |
| 78 | Mohan Rao,  Et al, (2011), 78 | India | | Review |  |  |  |  | + |  |
| 79 | Michael R Reich  Et al, (2016), 79 | Bangladesh  Brazil, Ethiopia,  France, Ghana, Indonesia, Japan, Peru, Thailand,  Turkey, Vietnam | | Review |  |  |  |  | + |  |
| 80 | Priyanka Saksena  Et al, (2014), 80 | Cross country | | Collection review |  |  |  |  | + |  |
| 81 | Shadi S Saleh  Et al,(2014) 81 | Tunisia,  Egypt,  Libya  Yemen | | Review |  |  |  | + |  |  |
| 82 | RAKESH SARWAL  (2015), 82 | Cross country | | Review & interviews |  |  |  | + |  |  |
| 83 | William D Savedoff  Et al, (2012), 83 | Cross country | | Review |  |  |  |  | + |  |
| 84 | Frida Simonstein  (2013), 84 | Israeli | | Case study |  |  |  |  | + |  |
| 85 | Cathy Schoen  Et al, (2008), 85 |  | | ---------------- |  |  |  |  |  |  |
| 86 | NeelamSekhri  Et al, (2006), 86 | Cross country | | Review |  |  |  |  | + |  |
| 87 | Kenji Shibuya  Et al, (2011), 87 | Japan | | Review |  |  |  |  | + |  |
| 88 | Tewarit Somkotra  (2010), 88 | Thailand | | Survey |  |  | + |  |  |  |
| 89 | Angelica Sousa  Et al, (2014), 89 | Cameroon  Kenya  Sudan  Zambia | | Comprehensive analysis |  |  | + |  |  |  |
| 90 | Ernst Spaan  Et al, (2012), 90 | Cross country | | Systematic reviews |  |  |  |  | + |  |
| 91 | Chutima Suraratdecha  Et al, (2005), 91 | Thailand | | Survey |  |  | + |  |  |  |
| 92 | Janice M. Swanson  (1988), 92 | Cuba | | Review |  |  |  |  | + |  |
| 93 | Kelvin Bryan Tan  Et al, (2014), 93 | Singapore | | Collection review |  |  |  |  | + |  |
| 94 | Shenglan Tang  Et al, (2012), 94 | China | | Review |  |  |  |  | + |  |
| 95 | VirojTangcharoensathien Et al, (2014), 95 | Thailand | | Collection review |  |  |  |  | + |  |
| 96 | VirojTangcharoensathien, Et all, (2015), 96 | Thailand | | Document reviews |  |  |  |  | + |  |
| 97 | VirojTangcharoensathien, Et al, (2012), 97 | Thailand | | Review |  |  |  |  | + |  |
| 98 | VirojTangcharoensathien Et al, (2011), 98 | southeast Asia | | Review |  |  |  |  | + |  |
| 99 | VirojTangcharoensathien Et al, (2013), 99 | Thailand | | Reviews of relevant documents, in-depth interviews |  |  |  | + |  |  |
| 100 | Daniel Titelman  Et al, (2015), 100 | Latin American countries | | Review |  |  |  |  | + |  |
| 101 | Radha Madhab Tripathy (2014), 101 | India | | Review |  |  |  |  | + |  |
| 102 | Kate Tulenko  Et al, (2013), 102 | Cross country | | Review |  |  |  |  | + |  |
| 103 | BSC Uzochukwu  et al, (2015), 103 | Nigeria | | Review |  |  |  |  | + |  |
| 104 | Hoang Van Minh  Et al, (2014), 104 | ASEAN | | Review |  |  |  |  | + |  |
| 105 | Taryn Vian  Et al, (2015), 105 | Moldova | | Survey  FGD  Interview |  |  |  |  | + |  |
| 106 | Cesar G Victora  Et al, (2004), 106 | Cross country | | Review |  |  |  |  | + |  |
| 107 | Ileana Vilcu  Et al, (2016), 107 | Eastern European | | Literature review and review of databases |  |  |  |  | + |  |
| 108 | Anita K Wagner  Et al, (2014), 108 | low and  middle-income country | | Review |  |  |  |  | + |  |
| 109 | Katie Wellstood  Et al, (2006), 109 | Canada | | Interviews |  | + |  |  |  |  |
| 110 | Nanzi Xiao  Et al, (2014), 110 | China | | -------- |  |  |  | + |  |  |
| 111 | GulbiyeYenimahalleliYasar Et al, (2011), 111 | Turkey | | -------- |  |  | + |  |  |  |
| 112 | Hao Yu, (2015), 112 | China | | Review & quantitative |  |  |  | + |  |  |
| 113 | AkakiZoidze  Et al, (2013), 113 | Georgia | | Document review and secondary analysis |  |  |  | + |  |  |
| 114 | Susana T Fried  Et al, (2013), 114 | ------ | | Review |  |  |  |  | + |  |
| 115 | Irene Garcia-Subirats  et al, (2014), 115 | Colombia  Brazil | | Cross-sectional |  |  |  |  |  |  |
| 116 | Felicia Marie Knaul  Et al, (2012), 116 | | Mexico | ------------------ |  |  |  |  |  |  |
| 117 | Joseph Kutzin  (2013), 117 | Switzerland | | ----------------- |  |  |  | + |  |  |
| 118 | Supasit Pannarunothai  Et al, (2004), 118 | Thailand | | Questionnaire survey  In-depth interview |  |  |  | + |  |  |
| 119 | Phudit Tejativaddhana  Et al, (2012), 119 | Thailand | | Interviews |  | + |  |  |  |  |
| 120 | Takashi hatanaka,  et al,(2015) 120 | Japan | | Interviews  Review |  |  |  | + |  |  |
| 121 | Hidechika Akashi  Et al, (2015), 121 | Japan | | Review |  |  |  |  | + |  |
| 122 | Sarah Alkenbrack  Et al, (2013), 122 | Lao PDR | | Survey &  Fgd |  |  |  | + |  |  |
| 123 | Maureen L Chirwa  Et al, (2013), 123 | Malawi | | Qualitative quantitative research |  |  |  | + |  |  |
| 124 | Jeannette Liliana Amaya (2014), 124 | | LaGuajira, Colombia | Survey |  |  | + |  |  |  |
| 125 | KannikaDamrongplasit, Et al, (2015), 125 | Thailand | | National survey |  |  | + |  |  |  |
| 126 | Stephen Gorin  (1997), 126 | United States | | Review |  |  |  |  | + |  |
| 127 | Taufique Joarder  Et al, (2013), 127 | Bangladesh | | Review |  |  |  |  | + |  |
| 128 | InkeMathauer  Et al, (2011), 128 | Lesotho | | Qualitative quantitative research |  |  |  | + |  |  |
| 129 | K Srinath Reddy  Et al, 129 | India | | Case study |  |  |  |  | + |  |
| 130 | Xenia Scheil-Adlung  (2013), 130 | low-income countries | | Review |  |  |  |  | + |  |
| 131 | Zile Singh  (2013), 131 | India | | Case study |  |  |  |  | + |  |
| 132 | Jing Sun, Et al,  (2014), 132 | China | | Case study |  |  | + |  |  |  |
| 133 | Philip Wahlster  Et al, (2015), 133 | Cross country | | Literature review |  |  |  |  | + |  |
| 134 | Veronika J Wirtz  Et al (2016), 134 |  | | Qualitative quantitative research |  |  |  | + |  |  |
| 135 | Guy Carrin  Et al (2004), 135 | Germany, Austria, Belgium, Costa Rica, Israel and Luxembourg. Japan  Republic of Korea | | Review |  |  |  |  | + |  |
| 136 | Benjamin Chemouni  (2018), 136 | Rwanda | | Historical narrative |  | + |  |  |  |  |
| 137 | Md Shafiur Rahman,  Et al, (2018), 137 | Bangladesh | | Survey |  |  | + |  |  |  |
| 138 | Angela Y. Chang  Et al, (2017), 138 | Cross country | | Systematic review |  |  |  |  | + |  |
| 139 | Viviane Helena de França, Et al, (2016), 139 | Brazil | | Interviews |  | + |  |  |  |  |
| 140 | Denise Bryant-Lukosius, et al, (2017), 140 | Cross country | | Examined literature |  |  |  |  | + |  |
| 141 | Miqdad Asaria  Et al, (2016), 141 | UK | | Longitudinal  Study |  |  | + |  |  |  |
| 142 | Stephen Whiting  Et al, (2016), 142 | Solomon Islands | | Review |  |  |  |  | + |  |
| 143 | Randa Alami (2017), 143 | middle-income Arab countries | | Review |  |  |  |  | + |  |
| 144 | Shankar Prinja,  Et al, (2016), 144 | India | | Cross-sectional survey |  |  | + |  |  |  |
| 145 | Elizabeth Pisani  Et al, (2017), 145 | Indonesia | | Case study,  Interviews |  |  |  | + |  |  |
| 146 | Jahangir A. M Khan, et al (2017), 146 | Bangladesh | | Qualitative quantitative research |  |  |  | + |  |  |
| 147 | Augustine D Asante, et al, (2017), 147 | Fiji island | | Cross-sectional  Survey |  |  | + |  |  |  |
| 148 | R Baltussen, et al,  (2017), 148 | Cross country | | Review |  |  |  |  | + |  |
| 149 | Adam Wagstaff, et al, (2016), 149 | Cross country | | Review |  |  |  |  | + |  |
| 150 | Antenor Hallo de Wolf, et al (2016), 150 | Netherland | | Review |  |  |  |  | + |  |
| 151 | Yu-Tung Hsu, et al (2017), 151 | Thailand | | Qualitative quantitative research |  |  |  | + |  |  |
| 152 | Allison Beattie, et al,  (2016), 152 | Asia country | | Review |  |  |  |  | + |  |
| 153 | Gerald Bloom (2016), 153 | japan | | Commentary |  |  |  |  |  | + |
| 154 | Stéphane Verguet, (2017), 154 | Cross country | | Commentary |  |  |  |  |  | + |
| 155 | Verulava T, et al, (2017), 155 | Georgia | | Qualita­tive and quantitative |  |  |  | + |  |  |
| 156 | Mehrolhassani MH, et al, (2017), 156 | Iran | | Qualitative research |  | + |  |  |  |  |
| 157 | Rajat Das Gupta, et al, (2018), 157 | Bangladesh | | Review |  |  |  |  | + |  |
| 158 | Global Burden of Disease Health Financing Collaborator Network (2018), 158 | Cross country | | ------ |  |  | + |  |  |  |
| 159 | JR Reddock, (2017), 159 | ------ | | Review |  |  |  |  |  |  |
| 160 | Irene Akua Agyepong, et al (2016), 160 | Ghana | | Cross sectional  Fgd  Interview |  |  |  | + |  |  |
| 161 | Md. Rashedul Islam, et al, (2017), 161 | Bangladesh | | Cross sectional  Survey |  |  | + |  |  |  |
| 162 | Y. S. Wong, et al, (2016), 162 | Malaysia | | Participant observation, interview  FGD |  |  |  | + |  |  |
| 163 | Mariyam Suzana, et al, (2017), 163 | Cross country | | Review & quantitative |  |  |  | + |  |  |
| 164 | Carolien Aantjes, et al, (2015), 164 | Zambia | | Review  Observation, Interview  FGD |  |  |  | + |  |  |
| 165 | Uranchimeg Tsevelvaanchig, et al, (2018), 165 | Mongolia | | Documentary review,  in‐depth interviews |  |  |  | + |  |  |
| 166 | Rami Yassoub, et al, (2015), 166 | Lebanon | | Expert panel  Review |  |  |  | + |  |  |

**Appendix 2-** Identity of Indicators to achieve Universal Health Coverage

| Identity of Indicators to achieve Universal Health Coverage | | | |
| --- | --- | --- | --- |
| Dimension | | Axes | |
| Social Infrastructure & Sustainability  Financial and Economic Infrastructures  Health Status Service Delivery  Coverage Global Movements  Stewardship /governance | | Age Group | |
| Indicator Title | |
| **1-** Percent of population who ages 0-5 years | |
| Indicator Definition | |
| ---- | |
| Data Collection Method | Data Collection Source | Formula | |
| Document | The World Bank Data & [Statistical Center of Iran](https://www.amar.org.ir/english/) | population ages 0-5 years * 100 | Numerator |
| Population total | Denominator |

| Identity of Indicators to achieve Universal Health Coverage | | | |
| --- | --- | --- | --- |
| Dimension | | Axes | |
| Social Infrastructure & Sustainability  Financial and Economic Infrastructures  Health Status Service Delivery  Coverage Global Movements  Stewardship /governance | | Age Group | |
| Indicator Title | |
| 2- Percent of population who ages 6-17 years | |
| Indicator Definition | |
| ---- | |
| Data Collection Method | Data Collection Source | Formula | |
| Document | The World Bank Data & [Statistical Center of Iran](https://www.amar.org.ir/english/) | population ages 6-17 years * 100 | Numerator |
| Population total | Denominator |

| Identity of Indicators to achieve Universal Health Coverage | | | |
| --- | --- | --- | --- |
| Dimension | | Axes | |
| Social Infrastructure & Sustainability  Financial and Economic Infrastructures  Health Status Service Delivery  Coverage Global Movements  Stewardship /governance | | Age Group | |
| Indicator Title | |
| 3- Percent of population who ages 18-39 years | |
| Indicator Definition | |
| ---- | |
| Data Collection Method | Data Collection Source | Formula | |
| Document | The World Bank Data & [Statistical Center of Iran](https://www.amar.org.ir/english/) | population ages 18-39 years * 100 | Numerator |
| Population total | Denominator |

| Identity of Indicators to achieve Universal Health Coverage | | | |
| --- | --- | --- | --- |
| Dimension | | Axes | |
| Social Infrastructure & Sustainability  Financial and Economic Infrastructures  Health Status Service Delivery  Coverage Global Movements  Stewardship /governance | | Age Group | |
| Indicator Title | |
| 4- Percent of population who ages 40-64years | |
| Indicator Definition | |
| ---- | |
| Data Collection Method | Data Collection Source | Formula | |
| Document | The World Bank Data & [Statistical Center of Iran](https://www.amar.org.ir/english/) | Population ages 40-64years * 100 | Numerator |
| Population total | Denominator |

| Identity of Indicators to achieve Universal Health Coverage | | | |
| --- | --- | --- | --- |
| Dimension | | Axes | |
| Social Infrastructure & Sustainability  Financial and Economic Infrastructures  Health Status Service Delivery  Coverage Global Movements  Stewardship /governance | | Age Group | |
| Indicator Title | |
| 5- Percent of population who ages 65 years or older | |
| Indicator Definition | |
| --- | |
| Data Collection Method | Data Collection Source | Formula | |
| Document | The World Bank Data & [Statistical Center of Iran](https://www.amar.org.ir/english/) | population ages 65 years or older * 100 | Numerator |
| Population total | Denominator |

| Identity of Indicators to achieve Universal Health Coverage | | | |
| --- | --- | --- | --- |
| Dimension | | Axes | |
| Social Infrastructure & Sustainability  Financial and Economic Infrastructures  Health Status Service Delivery  Coverage Global Movements  Stewardship /governance | | Population | |
| Indicator Title | |
| 6- Total population (pop.) | |
| Indicator Definition | |
| All of person live in country | |
| Data Collection Method | Data Collection Source | Formula | |
| Document | The World Bank Data & [Statistical Center of Iran](https://www.amar.org.ir/english/) | Total population | Numerator |
| Denominator |

| Identity of Indicators to achieve Universal Health Coverage | | |
| --- | --- | --- |
| Dimension | | Axes |
| Social Infrastructure & Sustainability  Financial and Economic Infrastructures  Health Status Service Delivery  Coverage Global Movements  Stewardship /governance | | Population |
| Indicator Title |
| 7- Population growth rate (%) |
| Indicator Definition |
| The average annual rate of change of population size during a specified period. |
| Data Collection Method | Data Collection Source | Formula |
| Document | The World Bank Data & [Statistical Center of Iran](https://www.amar.org.ir/english/) | 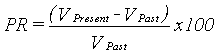 |

| Identity of Indicators to achieve Universal Health Coverage | | | |
| --- | --- | --- | --- |
| Dimension | | Axes | |
| Social Infrastructure & Sustainability  Financial and Economic Infrastructures  Health Status Service Delivery  Coverage Global Movements  Stewardship /governance | | Population | |
| Indicator Title | |
| 8- Economically active pop. | |
| Indicator Definition | |
| The fraction of a population that is either employed or actively seeking employment. | |
| Data Collection Method | Data Collection Source | Formula | |
| Document | The World Bank Data & [Statistical Center of Iran](https://www.amar.org.ir/english/) | Economically active population | Numerator |
| Total population | Denominator |

| Identity of Indicators to achieve Universal Health Coverage | | | |
| --- | --- | --- | --- |
| Dimension | | Axes | |
| Social Infrastructure & Sustainability  Financial and Economic Infrastructures  Health Status Service Delivery  Coverage Global Movements  Stewardship /governance | | Population | |
| Indicator Title | |
| 9- Population employed in the informal Population sector economically (%) | |
| Indicator Definition | |
| Who work in the informal sector | |
| Data Collection Method | Data Collection Source | Formula | |
| Document | [Statistical Center of Iran](https://www.amar.org.ir/english/) | Population employed in the informal sector * 100 | Numerator |
| Economically active population | Denominator |

| Identity of Indicators to achieve Universal Health Coverage | | | |
| --- | --- | --- | --- |
| Dimension | | Axes | |
| Social Infrastructure & Sustainability  Financial and Economic Infrastructures  Health Status Service Delivery  Coverage Global Movements  Stewardship /governance | | Population | |
| Indicator Title | |
| 10- Population employed in the formal sector economically (%) | |
| Indicator Definition | |
| Who work in the formal sector | |
| Data Collection Method | Data Collection Source | Formula | |
| Document | [Statistical Center of Iran](https://www.amar.org.ir/english/) | Population employed in the formal sector * 100 | Numerator |
| Economically active population | Denominator |

| Identity of Indicators to achieve Universal Health Coverage | | | |
| --- | --- | --- | --- |
| Dimension | | Axes | |
| Social Infrastructure & Sustainability  Financial and Economic Infrastructures  Health Status Service Delivery  Coverage Global Movements  Stewardship /governance | | Literacy and Education | |
| Indicator Title | |
| 11- Adult Literacy Rate | |
| Indicator Definition | |
| The percentage of population aged 15 years and over who can both read and write with understanding a short simple statement on his/her everyday life. | |
| Data Collection Method | Data Collection Source | Formula | |
| Document | The World Bank Data & [Statistical Center of Iran](https://www.amar.org.ir/english/) | The proportion of the adult population aged 15 years and over that is literate * 100 | Numerator |
| Total population | Denominator |

| Identity of Indicators to achieve Universal Health Coverage | | | |
| --- | --- | --- | --- |
| Dimension | | Axes | |
| Social Infrastructure & Sustainability  Financial and Economic Infrastructures  Health Status Service Delivery  Coverage Global Movements  Stewardship /governance | | Literacy and Education | |
| Indicator Title | |
| 12- Children Reaching Grade 5 of Primary Education | |
| Indicator Definition | |
| Children who Grade 5 of Primary Education. | |
| Data Collection Method | Data Collection Source | Formula | |
| Document | Statistical Center of Iran & school registration | Children Grade 5 of Primary Education | Numerator |
| Children total in this age | Denominator |

| Identity of Indicators to achieve Universal Health Coverage | | | |
| --- | --- | --- | --- |
| Dimension | | Axes | |
| Social Infrastructure & Sustainability  Financial and Economic Infrastructures  Health Status Service Delivery  Coverage Global Movements  Stewardship /governance | | Literacy and Education | |
| Indicator Title | |
| 13- Adult Secondary Education Achievement Level | |
| Indicator Definition | |
| Adult Secondary Schooling Attainment Level is defined as the proportion of the population of working age (25-64 years) which has completed at least (upper) secondary education. | |
| Data Collection Method | Data Collection Source | Formula | |
| Document | Statistical Center of Iran & school registration | Who completed at least secondary education * 100 | Numerator |
| population of working age (25-64 years) | Denominator |

| Identity of Indicators to achieve Universal Health Coverage | | | |
| --- | --- | --- | --- |
| Dimension | | Axes | |
| Social Infrastructure & Sustainability  Financial and Economic Infrastructures  Health Status Service Delivery  Coverage Global Movements  Stewardship /governance | | Poverty | |
| Indicator Title | |
| 14- Unemployment Rate | |
| Indicator Definition | |
| All people aged 10 or over have been able to take part in production of goods or services (unemployed) but are considered as economically active population. | |
| Data Collection Method | Data Collection Source | Formula | |
| Document | Statistical Center of Iran | Civilian Labor Force | Numerator |
| Unemployed | Denominator |

| Identity of Indicators to achieve Universal Health Coverage | | | |
| --- | --- | --- | --- |
| Dimension | | Axes | |
| Social Infrastructure & Sustainability  Financial and Economic Infrastructures  Health Status Service Delivery  Coverage Global Movements  Stewardship /governance | | Poverty | |
| Indicator Title | |
| 15- Percent of Population Living below the Poverty Line | |
| Indicator Definition | |
| Poverty line is the minimum level of [income](https://en.wikipedia.org/wiki/Income) deemed adequate in a particular country. | |
| Data Collection Method | Data Collection Source | Formula | |
| Document | Statistical Center of Iran | 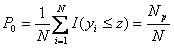 | Numerator |
| Denominator |

| Identity of Indicators to achieve Universal Health Coverage | | |
| --- | --- | --- |
| Dimension | | Axes |
| Social Infrastructure & Sustainability  Financial and Economic Infrastructures  Health Status Service Delivery  Coverage Global Movements  Stewardship /governance | | Poverty |
| Indicator Title |
| 16- Gini Index of Income Inequality |
| Indicator Definition |
| The Gini coefficient is a measure of statistical dispersion intended to represent the income or wealth distribution of a nation's residents, and is the most commonly used measurement of inequality. |
| Data Collection Method | Data Collection Source | Formula |
| Document | Statistical Center of Iran  ministry of economic affairs |  |

| Identity of Indicators to achieve Universal Health Coverage | | | |
| --- | --- | --- | --- |
| Dimension | | Axes | |
| Social Infrastructure & Sustainability  Financial and Economic Infrastructures  Health Status Service Delivery  Coverage Global Movements  Stewardship /governance | | GDP trends | |
| Indicator Title | |
| 17- GDP per capita | |
| Indicator Definition | |
| GDP [per capita](https://www.thebalance.com/per-capita-what-it-means-calculation-how-to-use-it-3305876) is a measure of a country's economic output that accounts for its number of people. | |
| Data Collection Method | Data Collection Source | Formula | |
| Documents | WHO &  Statistical Center of Iran | Real GDP | Numerator |
| Population | Denominator |

| Identity of Indicators to achieve Universal Health Coverage | | | |
| --- | --- | --- | --- |
| Dimension | | Axes | |
| Social Infrastructure & Sustainability  Financial and Economic Infrastructures  Health Status Service Delivery  Coverage Global Movements  Stewardship /governance | | GDP trends | |
| Indicator Title | |
| 18- GDP growth rate | |
| Indicator Definition | |
| The annualized GDP growth rate is a measure of the increase or decrease of the GDP from one year to the next. | |
| Data Collection Method | Data Collection Source | Formula | |
| Documents | The World Bank Data | 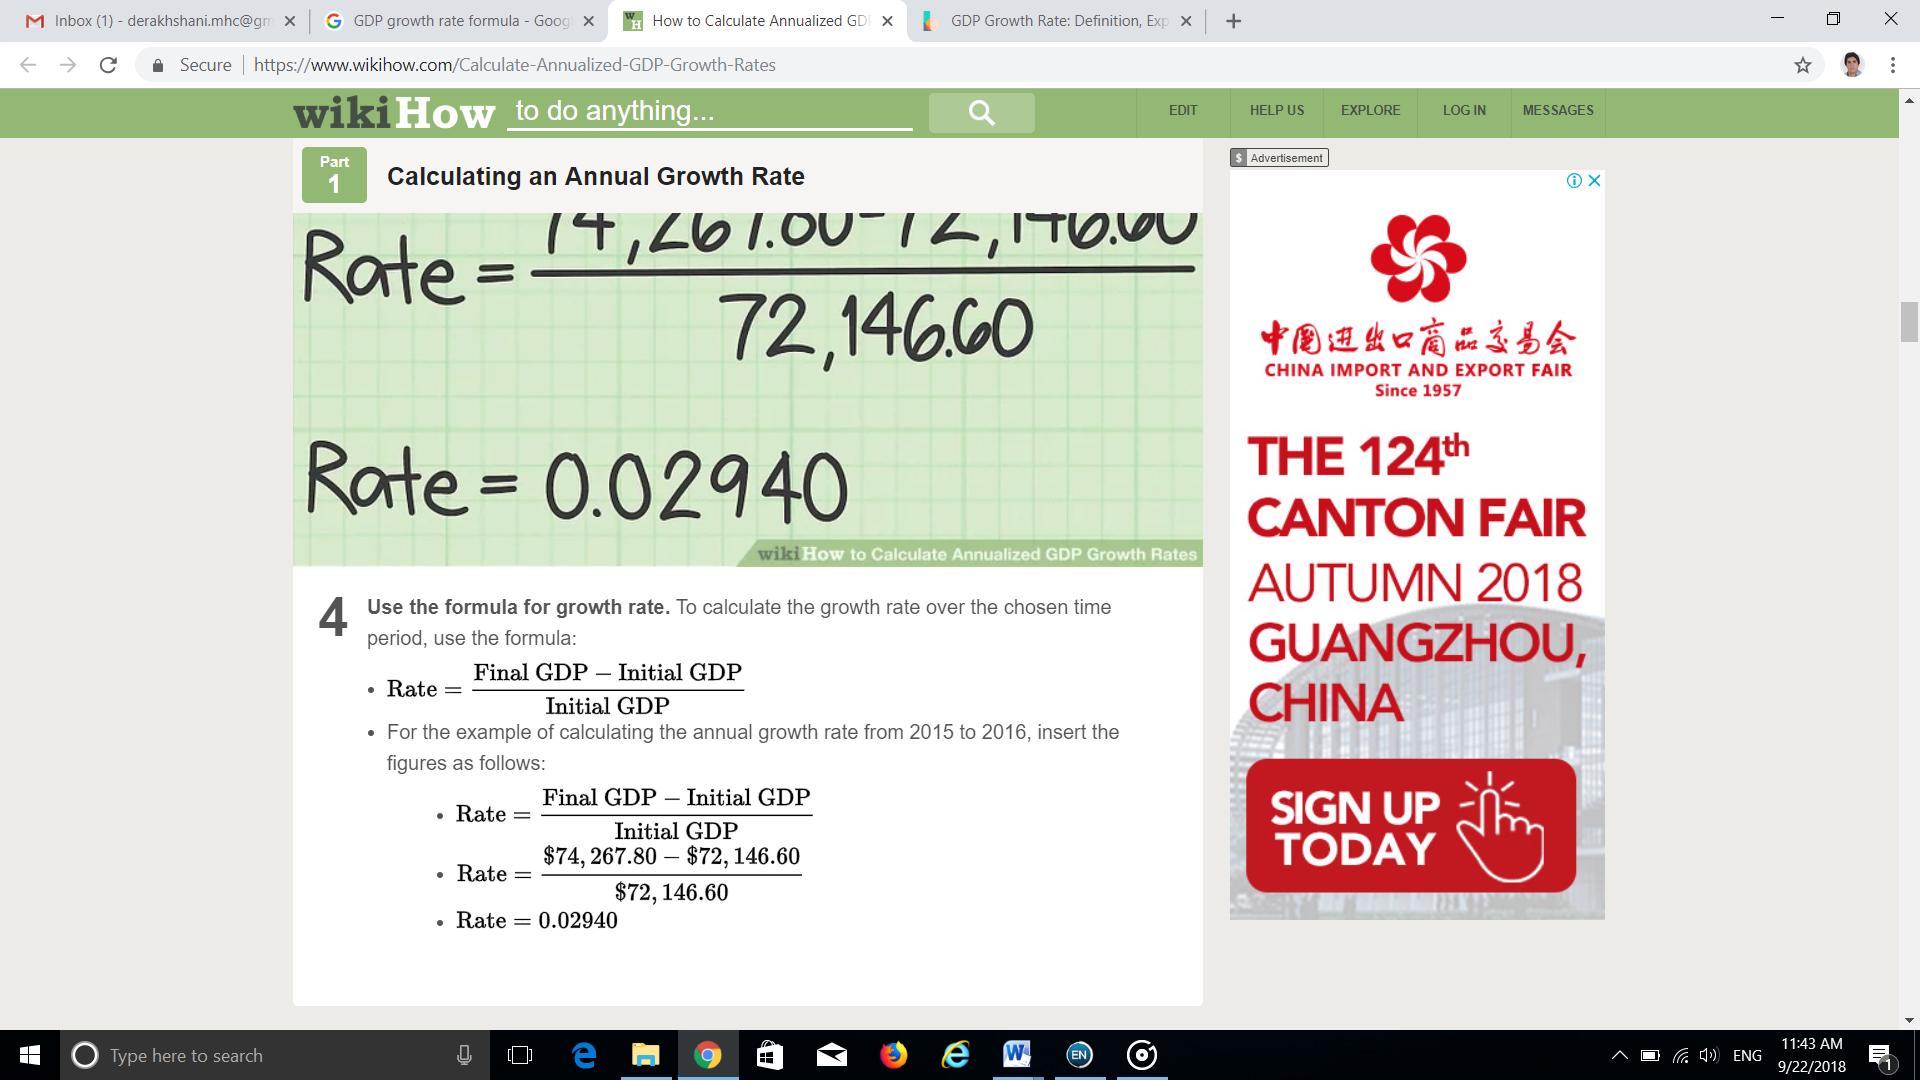 | Numerator |
| Denominator |

| Identity of Indicators to achieve Universal Health Coverage | | |
| --- | --- | --- |
| Dimension | | Axes |
| Social Infrastructure & Sustainability  Financial and Economic Infrastructures  Health Status Service Delivery  Coverage Global Movements  Stewardship /governance | | GDP trends |
| Indicator Title |
| 19- GDP adjusted |
| Indicator Definition |
| The nominal GDP is the value of all the final goods and services that an economy produced during a given year. Nominal value changes due to shifts in quantity and price |
| Data Collection Method | Data Collection Source | Formula |
| Documents | The World Bank Data | Nominal GDP=GDP Deflator * Real GDP |

| Identity of Indicators to achieve Universal Health Coverage | | | |
| --- | --- | --- | --- |
| Dimension | | Axes | |
| Social Infrastructure & Sustainability  Financial and Economic Infrastructures  Health Status Service Delivery  Coverage Global Movements  Stewardship /governance | | Currency | |
| Indicator Title | |
| 20- National currency unit | |
| Indicator Definition | |
| A national currency is a legal tender issued by a country's central bank or monetary authority. | |
| Data Collection Method | Data Collection Source | Formula | |
| Document | Central Bank | ----------- | Numerator |
| ----------- | Denominator |

| Identity of Indicators to achieve Universal Health Coverage | | | |
| --- | --- | --- | --- |
| Dimension | | Axes | |
| Social Infrastructure & Sustainability  Financial and Economic Infrastructures  Health Status Service Delivery  Coverage Global Movements  Stewardship /governance | | Currency | |
| Indicator Title | |
| 21- Exchange rate US$ | |
| Indicator Definition | |
| the percentage discrepancy, take the difference between the two exchange rates, and divide it by the market exchange rate | |
| Data Collection Method | Data Collection Source | Formula | |
| Review Daily data | The World Bank Data |  | Numerator |
| Denominator |

| Identity of Indicators to achieve Universal Health Coverage | | |
| --- | --- | --- |
| Dimension | | Axes |
| Social Infrastructure & Sustainability  Financial and Economic Infrastructures  Health Status Service Delivery  Coverage Global Movements  Stewardship /governance | | Health Expenditure Statistics |
| Indicator Title |
| 22- Total health expenditure (THE) |
| Indicator Definition |
| Is the sum of general government health expenditure and private health expenditure in a given year, calculated in national currency units in current prices. |
| Data Collection Method | Data Collection Source | Formula |
| Documents | WHO &  National Health Accounts | Total expenditure on health (THE) is measured as the sum of all financing agents managing funds to purchase health goods and services. |

| Identity of Indicators to achieve Universal Health Coverage | | | |
| --- | --- | --- | --- |
| Dimension | | Axes | |
| Social Infrastructure & Sustainability  Financial and Economic Infrastructures  Health Status Service Delivery  Coverage Global Movements  Stewardship /governance | | Health Expenditure Statistics | |
| Indicator Title | |
| 23- Total health expenditure (THE) as % of GDP | |
| Indicator Definition | |
| Total health expenditure as percentage of Gross Domestic Product (GDP) | |
| Data Collection Method | Data Collection Source | Formula | |
| Documents | Ministry of health & WHO & National Health Accounts | Total health expenditure * 100 | Numerator |
| GDP | Denominator |

| Identity of Indicators to achieve Universal Health Coverage | | | |
| --- | --- | --- | --- |
| Dimension | | Axes | |
| Social Infrastructure & Sustainability  Financial and Economic Infrastructures  Health Status Service Delivery  Coverage Global Movements  Stewardship /governance | | Health Expenditure Statistics | |
| Indicator Title | |
| 24- THE per capita (p.c.) in US$ (exchange rate) | |
| Indicator Definition | |
| Per capita total expenditure on health (THE) expressed at average exchange rate for that year in US$. Current prices. | |
| Data Collection Method | Data Collection Source | Formula | |
| Documents | Ministry of health & WHO & National Health Accounts | Total health expenditure | Numerator |
| Total population | Denominator |

| Identity of Indicators to achieve Universal Health Coverage | | | |
| --- | --- | --- | --- |
| Dimension | | Axes | |
| Social Infrastructure & Sustainability  Financial and Economic Infrastructures  Health Status Service Delivery  Coverage Global Movements  Stewardship /governance | | Health Expenditure Statistics | |
| Indicator Title | |
| 25- General govt. health expenditure as % of GGE | |
| Indicator Definition | |
| Percentage of total general government expenditure that is spent on health. Level of general government expenditure on health (GGHE) expressed as a percentage of total government expenditure. | |
| Data Collection Method | Data Collection Source | Formula | |
| Documents | Ministry of health & WHO & National Health Accounts | general government expenditure on health * 100 | Numerator |
| total government expenditure | Denominator |

| Identity of Indicators to achieve Universal Health Coverage | | | |
| --- | --- | --- | --- |
| Dimension | | Axes | |
| Social Infrastructure & Sustainability  Financial and Economic Infrastructures  Health Status Service Delivery  Coverage Global Movements  Stewardship /governance | | Health Expenditure Statistics | |
| Indicator Title | |
| 26- General govt. health expenditure as % of THE | |
| Indicator Definition | |
| Level of general government expenditure on health (GGHE) expressed as a percentage of total health expenditure. | |
| Data Collection Method | Data Collection Source | Formula | |
| Documents | Ministry of health & National Health Accounts | general government expenditure on health * 100 | Numerator |
| Total health expenditure | Denominator |

| Identity of Indicators to achieve Universal Health Coverage | | | |
| --- | --- | --- | --- |
| Dimension | | Axes | |
| Social Infrastructure & Sustainability  Financial and Economic Infrastructures  Health Status Service Delivery  Coverage Global Movements  Stewardship /governance | | Health Expenditure Statistics | |
| Indicator Title | |
| 27- General govt. health expenditure (GGHE) p.c. (USD) | |
| Indicator Definition | |
| General govt. health expenditure as a ratio of total population. | |
| Data Collection Method | Data Collection Source | Formula | |
| Documents | Ministry of health & National Health Accounts | general government expenditure on health | Numerator |
| Total population | Denominator |

| Identity of Indicators to achieve Universal Health Coverage | | | |
| --- | --- | --- | --- |
| Dimension | | Axes | |
| Social Infrastructure & Sustainability  Financial and Economic Infrastructures  Health Status Service Delivery  Coverage Global Movements  Stewardship /governance | | Health Expenditure Statistics | |
| Indicator Title | |
| 28- Out-of-pocket expenditure (OOP) per capita | |
| Indicator Definition | |
| Out-of-pocket expenditure on health as a ratio of total population | |
| Data Collection Method | Data Collection Source | Formula | |
| Documents | Ministry of health & National Health Accounts & WHO | Out-of-pocket expenditure | Numerator |
| Total population | Denominator |

| Identity of Indicators to achieve Universal Health Coverage | | | |
| --- | --- | --- | --- |
| Dimension | | Axes | |
| Social Infrastructure & Sustainability  Financial and Economic Infrastructures  Health Status Service Delivery  Coverage Global Movements  Stewardship /governance | | Health Expenditure Statistics | |
| Indicator Title | |
| 29- OOP expenditure as % of THE | |
| Indicator Definition | |
| Level of OOP expenditure on health expressed as a percentage of total health expenditure. | |
| Data Collection Method | Data Collection Source | Formula | |
| Documents | Ministry of health & National Health Accounts & WHO | Out-Of-Pocket Expenditure * 100 | Numerator |
| Total Health Expenditure | Denominator |

| Identity of Indicators to achieve Universal Health Coverage | | | |
| --- | --- | --- | --- |
| Dimension | | Axes | |
| Social Infrastructure & Sustainability  Financial and Economic Infrastructures  Health Status Service Delivery  Coverage Global Movements  Stewardship /governance | | Health Expenditure Statistics | |
| Indicator Title | |
| 30- General govt. expenditure as % of GDP | |
| Indicator Definition | |
| Level of general government expenditure expressed as a percentage of GDP. | |
| Data Collection Method | Data Collection Source | Formula | |
| Documents | Ministry of health & National Health Accounts & WHO | general government expenditure * 100 | Numerator |
| GDP | Denominator |

| Identity of Indicators to achieve Universal Health Coverage | | | |
| --- | --- | --- | --- |
| Dimension | | Axes | |
| Social Infrastructure & Sustainability  Financial and Economic Infrastructures  Health Status Service Delivery  Coverage Global Movements  Stewardship /governance | | Health Expenditure Statistics | |
| Indicator Title | |
| 31- Social security funds for health as % of GGHE | |
| Indicator Definition | |
| **---** | |
| Data Collection Method | Data Collection Source | Formula | |
| Documents | Ministry of health & National Health Accounts & WHO | Social Security Funds * 100 | Numerator |
| General Government Health Expenditure | Denominator |

| Identity of Indicators to achieve Universal Health Coverage | | | |
| --- | --- | --- | --- |
| Dimension | | Axes | |
| Social Infrastructure & Sustainability  Financial and Economic Infrastructures  Health Status Service Delivery  Coverage Global Movements  Stewardship /governance | | Health Expenditure Statistics | |
| Indicator Title | |
| 32- private insurance as % THE | |
| Indicator Definition | |
| **---** | |
| Data Collection Method | Data Collection Source | Formula | |
| Documents | Ministry of health & National Health Accounts | private insurance * 100 | Numerator |
| Total Health Expenditure | Denominator |

| Identity of Indicators to achieve Universal Health Coverage | | | |
| --- | --- | --- | --- |
| Dimension | | Axes | |
| Social Infrastructure & Sustainability  Financial and Economic Infrastructures  Health Status Service Delivery  Coverage Global Movements  Stewardship /governance | | Health Expenditure Statistics | |
| Indicator Title | |
| 33- Private health expenditure as % of THE | |
| Indicator Definition | |
| ------- | |
| Data Collection Method | Data Collection Source | Formula | |
| Documents | Ministry of health & National Health Accounts & WHO | Private health expenditure * 100 | Numerator |
| Total Health Expenditure | Denominator |

| Identity of Indicators to achieve Universal Health Coverage | | | |
| --- | --- | --- | --- |
| Dimension | | Axes | |
| Social Infrastructure & Sustainability  Financial and Economic Infrastructures  Health Status Service Delivery  Coverage Global Movements  Stewardship /governance | | Health Expenditure Statistics | |
| Indicator Title | |
| 34- supplemental insurance as (%) of total health expenditures | |
| Indicator Definition | |
| ------- | |
| Data Collection Method | Data Collection Source | Formula | |
| Documents | Ministry of health & National Health Accounts | supplemental insurance * 100 | Numerator |
| Total Health Expenditure | Denominator |

| Identity of Indicators to achieve Universal Health Coverage | | |
| --- | --- | --- |
| Dimension | | Axes |
| Social Infrastructure & Sustainability  Financial and Economic Infrastructures  Health Status Service Delivery  Coverage Global Movements  Stewardship /governance | | Health Expenditure Statistics |
| Indicator Title |
| 35- Fairness in Financial Contribution Index (FFCI) |
| Indicator Definition |
| An equal burden where every household would pay an equal share of its capacity to the health system |
| Data Collection Method | Data Collection Source | Formula |
| Documents | Ministry of health & National Health Accounts | 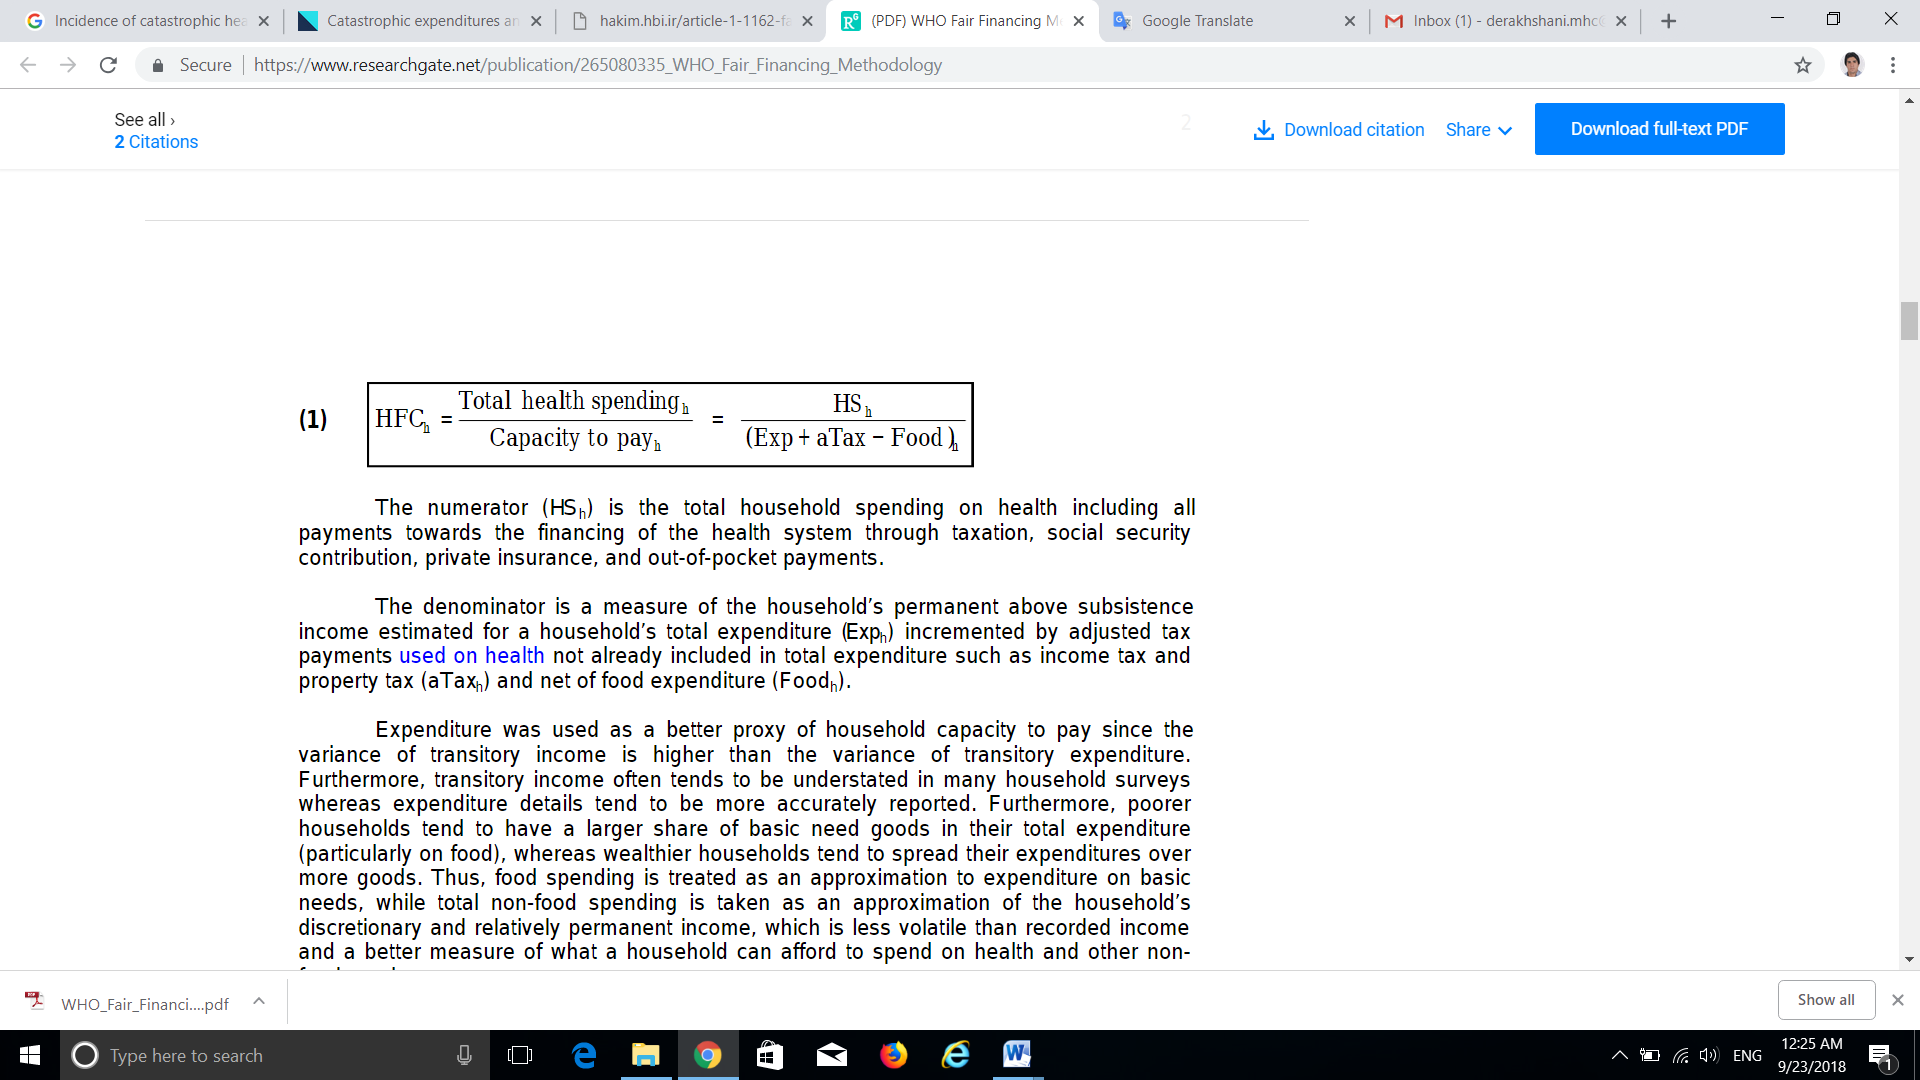 |

| Identity of Indicators to achieve Universal Health Coverage | | | |
| --- | --- | --- | --- |
| Dimension | | Axes | |
| Social Infrastructure & Sustainability  Financial and Economic Infrastructures  Health Status Service Delivery  Coverage Global Movements  Stewardship /governance | | Health Expenditure Statistics | |
| Indicator Title | |
| 36- Incidence of catastrophic health expenditure due to OOP payments | |
| Indicator Definition | |
| Percentage of population whose health expenditures exceeds 40% of non-food expenditure | |
| Data Collection Method | Data Collection Source | Formula | |
| Survey | Ministry of health & National Health Accounts & Household Survey | population whose health expenditures exceeds 40% of non-food expenditure * 100 | Numerator |
| Population who health expenditure due to OOP payments | Denominator |

| Identity of Indicators to achieve Universal Health Coverage | | | |
| --- | --- | --- | --- |
| Dimension | | Axes | |
| Social Infrastructure & Sustainability  Financial and Economic Infrastructures  Health Status Service Delivery  Coverage Global Movements  Stewardship /governance | | Health Expenditure Statistics | |
| Indicator Title | |
| 37- Incidence of impoverishment due to OOP payments | |
| Indicator Definition | |
| Percentage of population whose health expenditures put them below the poverty line | |
| Data Collection Method | Data Collection Source | Formula | |
| Survey | Ministry of health & National Health Accounts & Household Survey | population whose health expenditures put them below the poverty line | Numerator |
| Total population whose had a health expenditure | Denominator |

| Identity of Indicators to achieve Universal Health Coverage | | | |
| --- | --- | --- | --- |
| Dimension | | Axes | |
| Social Infrastructure & Sustainability  Financial and Economic Infrastructures  Health Status Service Delivery  Coverage Global Movements  Stewardship /governance | | Health Expenditure Statistics | |
| Indicator Title | |
| 38- Poverty gap due to OOP payments | |
| Indicator Definition | |
| Average amount by which expenditures fall below the poverty line, for those impoverished by OOP payments | |
| Data Collection Method | Data Collection Source | Formula | |
| Survey | Ministry of health & National Health Accounts & Household Survey | population who’s impoverished by OOP payments | Numerator |
| Total population whose had a OOP payment | Denominator |

| Identity of Indicators to achieve Universal Health Coverage | | | |
| --- | --- | --- | --- |
| Dimension | | Axes | |
| Social Infrastructure & Sustainability  Financial and Economic Infrastructures  Health Status Service Delivery  Coverage Global Movements  Stewardship /governance | | Health Expenditure Statistics | |
| Indicator Title | |
| 39- Average per capita household income of income quintiles in total national income | |
| Indicator Definition | |
| ------- | |
| Data Collection Method | Data Collection Source | Formula | |
| Survey | National Health Accounts & Household Survey | household income per capita | Numerator |
| total national income | Denominator |

| Identity of Indicators to achieve Universal Health Coverage | | |
| --- | --- | --- |
| Dimension | | Axes |
| Social Infrastructure & Sustainability  Financial and Economic Infrastructures  Health Status Service Delivery  Coverage Global Movements  Stewardship /governance | | Health Expenditure Statistics |
| Indicator Title |
| 40- Investment Share in GDP |
| Indicator Definition |
| This indicator refers to the share of investment in total production. It is obtained by calculating gross capital formation as percentage of gross domestic product. |
| Data Collection Method | Data Collection Source | Formula |
| Document review | National Health Accounts & Statistical center of iran | Gross capital formation at purchasers’ prices as percentage of gross domestic product at purchasers’ prices. |

| Identity of Indicators to achieve Universal Health Coverage | | |
| --- | --- | --- |
| Dimension | | Axes |
| Social Infrastructure & Sustainability  Financial and Economic Infrastructures  Health Status Service Delivery  Coverage Global Movements  Stewardship /governance | | Health Expenditure Statistics |
| Indicator Title |
| 41- Balance of Trade in Goods and Services |
| Indicator Definition |
| The balance of trade (B.O.T) is defined as the value of exports minus the value of imports. The balance of trade is also known as the "trade balance". |
| Data Collection Method | Data Collection Source | Formula |
| Document review | National Health Accounts & Statistical center of iran | B.O.T=Price of exports * Quantity of exports − Price of imports * Quantity of imports |

| Identity of Indicators to achieve Universal Health Coverage | | |
| --- | --- | --- |
| Dimension | | Axes |
| Social Infrastructure & Sustainability  Financial and Economic Infrastructures  Health Status Service Delivery  Coverage Global Movements  Stewardship /governance | | Health Expenditure Statistics |
| Indicator Title |
| 42- Debt to GDP Ratio |
| Indicator Definition |
| The debt-to-GDP ratio is the ratio of a country's public debt to its [gross domestic product (GDP)](https://www.investopedia.com/terms/g/gdp.asp). By comparing what a country owes with what it produces, the debt-to-GDP ratio indicates its [ability to pay](https://www.investopedia.com/terms/a/abilitytopay.asp) back its debts. |
| Data Collection Method | Data Collection Source | Formula |
| Document review | National Health Accounts & Statistical center of Iran | 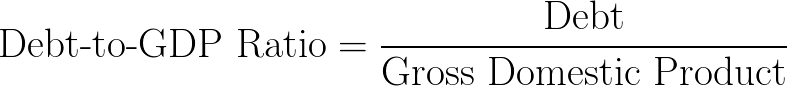 |

| Identity of Indicators to achieve Universal Health Coverage | | |
| --- | --- | --- |
| Dimension | | Axes |
| Social Infrastructure & Sustainability  Financial and Economic Infrastructures  Health Status Service Delivery  Coverage Global Movements  Stewardship /governance | | Mortality |
| Indicator Title |
| 43- Life expectancy at birth |
| Indicator Definition |
| ----- |
| Data Collection Method | Data Collection Source | Formula |
| Document review | Ministry of health data | The average number of years that a newborn could expect to live, if he or she were to pass through life subject to the age-specific death rates of a given period. |

| Identity of Indicators to achieve Universal Health Coverage | | |
| --- | --- | --- |
| Dimension | | Axes |
| Social Infrastructure & Sustainability  Financial and Economic Infrastructures  Health Status Service Delivery  Coverage Global Movements  Stewardship /governance | | Mortality |
| Indicator Title |
| 44- Healthy life expectancy (HALE) at birth |
| Indicator Definition |
| ------ |
| Data Collection Method | Data Collection Source | Formula |
| Document review | Statistical center of Iran Ministry of health data | The average equivalent number of years of full health that a newborn could expect to live, if he or she were to pass through life subject to the age-specific death rates and ill-health rates of a given period. |

| Identity of Indicators to achieve Universal Health Coverage | | |
| --- | --- | --- |
| Dimension | | Axes |
| Social Infrastructure & Sustainability  Financial and Economic Infrastructures  Health Status Service Delivery  Coverage Global Movements  Stewardship /governance | | Mortality |
| Indicator Title |
| 45- Probability of dying per 1 000 population between 15 and 60 years (adult mortality rate) |
| Indicator Definition |
| ----- |
| Data Collection Method | Data Collection Source | Formula |
| Document review | Statistical center of Iran Ministry of health data | Probability of dying per 1 000 population between 15 and 60 years |

| Identity of Indicators to achieve Universal Health Coverage | | |
| --- | --- | --- |
| Dimension | | Axes |
| Social Infrastructure & Sustainability  Financial and Economic Infrastructures  Health Status Service Delivery  Coverage Global Movements  Stewardship /governance | | Mortality |
| Indicator Title |
| 46- Probability of dying per 1 000 live births under 5 years (under-5 mortality rate) |
| Indicator Definition |
| ----- |
| Data Collection Method | Data Collection Source | Formula |
| Document review | Statistical center of Iran Ministry of health data | Under-five mortality rate refers to the probability of dying before age 5. It is expressed as deaths per 1,000 live births. |

| Identity of Indicators to achieve Universal Health Coverage | | | |
| --- | --- | --- | --- |
| Dimension | | Axes | |
| Social Infrastructure & Sustainability  Financial and Economic Infrastructures  Health Status Service Delivery  Coverage Global Movements  Stewardship /governance | | Mortality | |
| Indicator Title | |
| 47- Neonatal mortality rate (per 1 000 live births) | |
| Indicator Definition | |
| ------ | |
| Data Collection Method | Data Collection Source | Formula | |
| Document review | Statistical center of Iran Ministry of health data | Number of deaths in Neonatal population *1000 | Numerator |
| Total Neonatal population | Denominator |

| Identity of Indicators to achieve Universal Health Coverage | | | |
| --- | --- | --- | --- |
| Dimension | | Axes | |
| Social Infrastructure & Sustainability  Financial and Economic Infrastructures  Health Status Service Delivery  Coverage Global Movements  Stewardship /governance | | Mortality | |
| Indicator Title | |
| 48- Maternal mortality ratio (per 100 000 live births) | |
| Indicator Definition | |
| ------ | |
| Data Collection Method | Data Collection Source | Formula | |
| Document review | Statistical center of Iran Ministry of health data | Number of deaths in pregnant women * 100000 | Numerator |
| Total pregnant women | Denominator |

| Identity of Indicators to achieve Universal Health Coverage | | | |
| --- | --- | --- | --- |
| Dimension | | Axes | |
| Social Infrastructure & Sustainability  Financial and Economic Infrastructures  Health Status Service Delivery  Coverage Global Movements  Stewardship /governance | | Mortality | |
| Indicator Title | |
| 49- Cause-specific mortality rate (per 100 000 population): HIV/AIDS | |
| Indicator Definition | |
| ----- | |
| Data Collection Method | Data Collection Source | Formula | |
| Document review | Statistical center of Iran Ministry of health data | Number of deaths in HIV/AIDS * 100000 | Numerator |
| Total population of death with Cause-specific | Denominator |

| Identity of Indicators to achieve Universal Health Coverage | | | |
| --- | --- | --- | --- |
| Dimension | | Axes | |
| Social Infrastructure & Sustainability  Financial and Economic Infrastructures  Health Status Service Delivery  Coverage Global Movements  Stewardship /governance | | Mortality | |
| Indicator Title | |
| 50- Cause-specific mortality rate (per 100 000 population): Tuberculosis | |
| Indicator Definition | |
| ------ | |
| Data Collection Method | Data Collection Source | Formula | |
| Document review | Statistical center of Iran Ministry of health data | Number of deaths in Tuberculosis * 100000 | Numerator |
| Total population of death with Cause-specific | Denominator |

| Identity of Indicators to achieve Universal Health Coverage | | |
| --- | --- | --- |
| Dimension | | Axes |
| Social Infrastructure & Sustainability  Financial and Economic Infrastructures  Health Status Service Delivery  Coverage Global Movements  Stewardship /governance | | Mortality |
| Indicator Title |
| 51- Age-standardized mortality rate by cause (per 100 000 population) |
| Indicator Definition |
| ----- |
| Data Collection Method | Data Collection Source | Formula |
| Document review | Statistical center of Iran Ministry of health data |  |

| Identity of Indicators to achieve Universal Health Coverage | | |
| --- | --- | --- |
| Dimension | | Axes |
| Social Infrastructure & Sustainability  Financial and Economic Infrastructures  Health Status Service Delivery  Coverage Global Movements  Stewardship /governance | | Mortality |
| Indicator Title |
| 52- Years of life lost (YLLs) by broader causes |
| Indicator Definition |
| The years of life lost (percentage of total) indicator measures the YLL due to a cause as a proportion of the total YLL lost in the population due to premature mortality. |
| Data Collection Method | Data Collection Source | Formula |
| Document review | Statistical center of Iran Ministry of health data | YLL are calculated from the number of deaths multiplied by a standard life expectancy at the age at which death occurs |

| Identity of Indicators to achieve Universal Health Coverage | | | |
| --- | --- | --- | --- |
| Dimension | | Axes | |
| Social Infrastructure & Sustainability  Financial and Economic Infrastructures  Health Status Service Delivery  Coverage Global Movements  Stewardship /governance | | Mortality | |
| Indicator Title | |
| 53- Causes of death among children under-5 years of age | |
| Indicator Definition | |
| Leading causes of death in children under-5 years are preterm birth complications, pneumonia, birth asphyxia, diarrhea and malaria. | |
| Data Collection Method | Data Collection Source | Formula | |
| Document review | Ministry of health data & WHO | ------- | Numerator |
| -------- | Denominator |

| Identity of Indicators to achieve Universal Health Coverage | | | |
| --- | --- | --- | --- |
| Dimension | | Axes | |
| Social Infrastructure & Sustainability  Financial and Economic Infrastructures  Health Status Service Delivery  Coverage Global Movements  Stewardship /governance | | Morbidity | |
| Indicator Title | |
| 54- HIV prevalence among adults (15-49) | |
| Indicator Definition | |
| ------ | |
| Data Collection Method | Data Collection Source | Formula | |
| Document review | Ministry of health data & WHO | Adults among adults (15-49) were living with HIV * 100 | Numerator |
| Total adults among adults (15-49) | Denominator |

| Identity of Indicators to achieve Universal Health Coverage | | | |
| --- | --- | --- | --- |
| Dimension | | Axes | |
| Social Infrastructure & Sustainability  Financial and Economic Infrastructures  Health Status Service Delivery  Coverage Global Movements  Stewardship /governance | | Morbidity | |
| Indicator Title | |
| 55- Tuberculosis prevalence (per 100 000 population) | |
| Indicator Definition | |
| ----- | |
| Data Collection Method | Data Collection Source | Formula | |
| Document review | Ministry of health data & WHO | Who has Tuberculosis * 100 000 | Numerator |
| Total population in a year | Denominator |

| Identity of Indicators to achieve Universal Health Coverage | | | |
| --- | --- | --- | --- |
| Dimension | | Axes | |
| Social Infrastructure & Sustainability  Financial and Economic Infrastructures  Health Status Service Delivery  Coverage Global Movements  Stewardship /governance | | Morbidity | |
| Indicator Title | |
| 56- Tuberculosis incidence (per 100 000 population) | |
| Indicator Definition | |
| ----- | |
| Data Collection Method | Data Collection Source | Formula | |
| Document review | Ministry of health data & WHO | Who has Tuberculosis * 100 000 | Numerator |
| Total population in a year | Denominator |

| Identity of Indicators to achieve Universal Health Coverage | | | |
| --- | --- | --- | --- |
| Dimension | | Axes | |
| Social Infrastructure & Sustainability  Financial and Economic Infrastructures  Health Status Service Delivery  Coverage Global Movements  Stewardship /governance | | Morbidity | |
| Indicator Title | |
| 57- Number of confirmed poliomyelitis cases | |
| Indicator Definition | |
| ----- | |
| Data Collection Method | Data Collection Source | Formula | |
| Document review | Ministry of health data & WHO | - Number of poliomyelitis cases in a year | Numerator |
| Total population | Denominator |

| Identity of Indicators to achieve Universal Health Coverage | | | |
| --- | --- | --- | --- |
| Dimension | | Axes | |
| Social Infrastructure & Sustainability  Financial and Economic Infrastructures  Health Status Service Delivery  Coverage Global Movements  Stewardship /governance | | Geographical Access | |
| Indicator Title | |
| 58- Number and distribution of health facilities per 10 000 population | |
| Indicator Definition | |
| The number of health facilities per 10 000 population or the number of health facilities per total population living in a designated area. | |
| Data Collection Method | Data Collection Source | Formula | |
| Document review | Ministry of health data & WHO & National Health Accounts | Number of health facilities * 10 000 | Numerator |
| Total population in a designated area | Denominator |

| Identity of Indicators to achieve Universal Health Coverage | | |
| --- | --- | --- |
| Dimension | | Axes |
| Social Infrastructure & Sustainability  Financial and Economic Infrastructures  Health Status Service Delivery  Coverage Global Movements  Stewardship /governance | | Geographical Access |
| Indicator Title |
| 59- Number and distribution of inpatient beds per 10 000 population |
| Indicator Definition |
| The number of hospital beds available per every 10 000 inhabitants in a population. |
| Data Collection Method | Data Collection Source | Formula |
| Document review | Ministry of health data & WHO & National Health Accounts | Regional and global estimates are based on population-weighted averages weighted by the total population. These estimates are presented only if available data cover at least 50% of total population in the regional or global groupings |

| Identity of Indicators to achieve Universal Health Coverage | | | | | |
| --- | --- | --- | --- | --- | --- |
| Dimension | | | Axes | | |
| Social Infrastructure & Sustainability  Financial and Economic Infrastructures  Health Status Service Delivery  Coverage Global Movements  Stewardship /governance | | | Geographical Access | | |
| Indicator Title | | |
| 60- Number of outpatient department visits per 10 000 population per year | | |
| Indicator Definition | | |
| The number of outpatient visits to health facilities during one year relative to the total population of the same geographical area. Health facilities include all public, private, non-governmental and community-based health facilities in which general health services are offered. | | |
| Data Collection Method | Data Collection Source | | Formula | | |
| Document review | Ministry of health data & WHO & National Health Accounts | | Number of visits to health facilities for ambulant care (not including immunization) * 10 000 | Numerator | |
| Total population for the same geographical area | Denominator | |
| Identity of Indicators to achieve Universal Health Coverage | | | | | |
| Dimension | | | Axes | | |
| Social Infrastructure & Sustainability  Financial and Economic Infrastructures  Health Status Service Delivery  Coverage Global Movements  Stewardship /governance | | | Geographical Access | | |
| Indicator Title | | |
| 61- General service readiness score for health facilities | | |
| Indicator Definition | | |
| The overall score for a General service is the unweighted average of number of items present and functioning, expressed as a percentage of the total number of items in that service. | | |
| Data Collection Method | | Data Collection Source | Formula | | |
| Document review | | Ministry of health data & National Health Accounts | Number of facilities that offer and meet tracer criteria for General service | | Numerator |
| Total number of health facilities and total number of facilities offering General service | | Denominator |

| Identity of Indicators to achieve Universal Health Coverage | | | |
| --- | --- | --- | --- |
| Dimension | | Axes | |
| Social Infrastructure & Sustainability  Financial and Economic Infrastructures  Health Status Service Delivery  Coverage Global Movements  Stewardship /governance | | Geographical Access | |
| Indicator Title | |
| 62- Proportion of health facilities offering specific services | |
| Indicator Definition | |
| Cumulative availability of components required in health facilities to deliver specific services, expressed as percentage. | |
| Data Collection Method | Data Collection Source | Formula | |
| Document review | Ministry of health data & National Health Accounts | Number of facilities that offer and meet tracer criteria for specific services | Numerator |
| Total number of health facilities and total number of facilities offering specific services | Denominator |

| Identity of Indicators to achieve Universal Health Coverage | | | |
| --- | --- | --- | --- |
| Dimension | | Axes | |
| Social Infrastructure & Sustainability  Financial and Economic Infrastructures  Health Status Service Delivery  Coverage Global Movements  Stewardship /governance | | Geographical Access | |
| Indicator Title | |
| 63- Number and distribution of health facilities offering specific services per 10000 population | |
| Indicator Definition | |
| The number of health facilities per population of 10,000 or the number of health facilities per total population living in a designated area. | |
| Data Collection Method | Data Collection Source | Formula | |
| Document review | Ministry of health data & National Health Accounts | Number of health facilities * 10 000 | Numerator |
| Total population in a designated area | Denominator |

| Identity of Indicators to achieve Universal Health Coverage | | | |
| --- | --- | --- | --- |
| Dimension | | Axes | |
| Social Infrastructure & Sustainability  Financial and Economic Infrastructures  Health Status Service Delivery  Coverage Global Movements  Stewardship /governance | | Geographical Access | |
| Indicator Title | |
| 64- Specific-services readiness score for health facilities | |
| Indicator Definition | |
| Cumulative availability of components required in health facilities to deliver specific services, expressed as percentage. | |
| Data Collection Method | Data Collection Source | Formula | |
| Document review | Ministry of health data & National Health Accounts | Number of facilities that offer and meet tracer criteria for specific services | Numerator |
| Total number of health facilities and total number of facilities offering specific services | Denominator |

| Identity of Indicators to achieve Universal Health Coverage | | |
| --- | --- | --- |
| Dimension | | Axes |
| Social Infrastructure & Sustainability  Financial and Economic Infrastructures  Health Status Service Delivery  Coverage Global Movements  Stewardship /governance | |  |
| Indicator Title |
| 65- Total ODA Given or Received as a Percent of GNI |
| Indicator Definition |
| Net Official Development Assistance (ODA) given or received as a percentage of Gross National Income (GNI). |
| Data Collection Method | Data Collection Source | Formula |
| Document review | National Health Accounts & Statistical center of Iran | Official Development Assistance (ODA) consists of grants or loans to developing countries that are undertaken by the official sector with the purpose of promoting economic development and welfare. |

| Identity of Indicators to achieve Universal Health Coverage | | | |
| --- | --- | --- | --- |
| Dimension | | Axes | |
| Social Infrastructure & Sustainability  Financial and Economic Infrastructures  Health Status Service Delivery  Coverage Global Movements  Stewardship /governance | |  | |
| Indicator Title | |
| 66- Percent of Population with Access to Primary Health Care Facilities | |
| Indicator Definition | |
| Proportion of population with access to primary health care facilities. | |
| Data Collection Method | Data Collection Source | Formula | |
| Document review | National Health Accounts & Statistical center of Iran | The number of persons living within a convenient distance to primary care facilities. | Numerator |
| The total population | Denominator |

| Identity of Indicators to achieve Universal Health Coverage | | | |
| --- | --- | --- | --- |
| Dimension | | Axes | |
| Social Infrastructure & Sustainability  Financial and Economic Infrastructures  Health Status Service Delivery  Coverage Global Movements  Stewardship /governance | |  | |
| Indicator Title | |
| 67- Immunization Against Infectious Childhood Diseases | |
| Indicator Definition | |
| The percent of the eligible population that have been immunized according to national immunization policies. | |
| Data Collection Method | Data Collection Source | Formula | |
| Document review | National Health Accounts & ministry of health | Number of infants fully immunized with the specified vaccines * 100 | Numerator |
| Number of infants surviving to age one | Denominator |

| Identity of Indicators to achieve Universal Health Coverage | | | |
| --- | --- | --- | --- |
| Dimension | | Axes | |
| Social Infrastructure & Sustainability  Financial and Economic Infrastructures  Health Status Service Delivery  Coverage Global Movements  Stewardship /governance | |  | |
| Indicator Title | |
| 68- Contraceptive Prevalence Rate | |
| Indicator Definition | |
| The percentage of women aged 15-49 years, married or in-union, who are currently using, or whose sexual partner is using, at least one method of contraception, regardless of the method used. | |
| Data Collection Method | Data Collection Source | Formula | |
| Document review | National Health Accounts & ministry of health | Women of reproductive age (15-49) who are married or in union and who are currently using any method of contraception * 100 | Numerator |
| Total number of women of reproductive age (15-49) who are married or in union | Denominator |

| Identity of Indicators to achieve Universal Health Coverage | | |
| --- | --- | --- |
| Dimension | | Axes |
| Social Infrastructure & Sustainability  Financial and Economic Infrastructures  Health Status Service Delivery  Coverage Global Movements  Stewardship /governance | |  |
| Indicator Title |
| 69- Density of hospitals (per 100 000 population) |
| Indicator Definition |
| Number of hospitals (including rural, district, provincial, specialized, teaching and research hospitals), from the public and private sectors, per 100,000 population. |
| Data Collection Method | Data Collection Source | Formula |
| Document review | National Health Accounts & ministry of health data | Count of hospitals available in the country, divided by the number of population. |

| Identity of Indicators to achieve Universal Health Coverage | | |
| --- | --- | --- |
| Dimension | | Axes |
| Social Infrastructure & Sustainability  Financial and Economic Infrastructures  Health Status Service Delivery  Coverage Global Movements  Stewardship /governance | | Human Resources for Health |
| Indicator Title |
| 70- Generalist |
| Indicator Definition |
| Number of medical doctors’ generalist per 10 000 population. |
| Data Collection Method | Data Collection Source | Formula |
| Document review | National Health Accounts & ministry of health data | The method of estimation for density of physicians depends on the nature of the original data source. Estimating the number of physicians using population census data is a count of the number of people reporting 'physician' as their current occupation (as classified according to the tasks and duties of their job). |

| Identity of Indicators to achieve Universal Health Coverage | | |
| --- | --- | --- |
| Dimension | | Axes |
| Social Infrastructure & Sustainability  Financial and Economic Infrastructures  Health Status Service Delivery  Coverage Global Movements  Stewardship /governance | | Human Resources for Health |
| Indicator Title |
| 71- Specialist |
| Indicator Definition |
| Number of medical doctors specialist medical practitioners, per 10 000 population. |
| Data Collection Method | Data Collection Source | Formula |
| Document review | National Health Accounts & ministry of health data | The method of estimation for density of physicians depends on the nature of the original data source. Estimating the number of physicians using population census data is a count of the number of people reporting 'physician' as their current occupation (as classified according to the tasks and duties of their job). |

| Identity of Indicators to achieve Universal Health Coverage | | |
| --- | --- | --- |
| Dimension | | Axes |
| Social Infrastructure & Sustainability  Financial and Economic Infrastructures  Health Status Service Delivery  Coverage Global Movements  Stewardship /governance | | Human Resources for Health |
| Indicator Title |
| 72- Density of nursing and midwifery personnel (per 10 000 population) |
| Indicator Definition |
| Number of nursing and midwifery personnel per 10 000 population. |
| Data Collection Method | Data Collection Source | Formula |
| Document review | National Health Accounts & ministry of health data | The method of estimation for number of nursing and midwifery personnel (including professional nurses, professional midwives, auxiliary nurses, auxiliary midwives, enrolled nurses, enrolled midwives and related occupations such as dental nurses and primary care nurses) depends on the nature of the original data source. Enumeration based on population census data is a count of the number of people reporting their current occupation in nursing or midwifery (as classified according to the tasks and duties of their job). |

| Identity of Indicators to achieve Universal Health Coverage | | |
| --- | --- | --- |
| Dimension | | Axes |
| Social Infrastructure & Sustainability  Financial and Economic Infrastructures  Health Status Service Delivery  Coverage Global Movements  Stewardship /governance | | Human Resources for Health |
| Indicator Title |
| 73- Dentistry personnel |
| Indicator Definition |
| Number of dentists per 10 000 population. |
| Data Collection Method | Data Collection Source | Formula |
| Document review | National Health Accounts & ministry of health data | The method of estimation for number of dentists (including professional dentists) depends on the nature of the original data source. Enumeration based on population census data is a count of the number of people reporting their current occupation in dentistry (as classified according to the tasks and duties of their job). |

| Identity of Indicators to achieve Universal Health Coverage | | |
| --- | --- | --- |
| Dimension | | Axes |
| Social Infrastructure & Sustainability  Financial and Economic Infrastructures  Health Status Service Delivery  Coverage Global Movements  Stewardship /governance | | Human Resources for Health |
| Indicator Title |
| 74- Pharmaceutical personnel |
| Indicator Definition |
| Number of pharmacists per 10 000 population |
| Data Collection Method | Data Collection Source | Formula |
| Document review | National Health Accounts & ministry of health data | The method of estimation for number of pharmacists (including professional pharmacists) depends on the nature of the original data source. Enumeration based on population census data is a count of the number of people reporting their current occupation in dentistry (as classified according to the tasks and duties of their job). |

| Identity of Indicators to achieve Universal Health Coverage | | |
| --- | --- | --- |
| Dimension | | Axes |
| Social Infrastructure & Sustainability  Financial and Economic Infrastructures  Health Status Service Delivery  Coverage Global Movements  Stewardship /governance | | Human Resources for Health |
| Indicator Title |
| 75- Environmental/public health workers |
| Indicator Definition |
| Number of environment and public health workers per 10 000 population. |
| Data Collection Method | Data Collection Source | Formula |
| Document review | National Health Accounts & ministry of health data | The method of estimation for number of environment and public health workers (including environmental and public health officers, environmental and public health technicians, sanitarians, hygienists and related occupations) depends on the nature of the original data source. Enumeration based on population census data is a count of the number of people reporting their current occupation in dentistry (as classified according to the tasks and duties of their job). |

| Identity of Indicators to achieve Universal Health Coverage | | |
| --- | --- | --- |
| Dimension | | Axes |
| Social Infrastructure & Sustainability  Financial and Economic Infrastructures  Health Status Service Delivery  Coverage Global Movements  Stewardship /governance | | Insurance Coverage |
| Indicator Title |
| 76- Types of insurance coverage |
| Indicator Definition |
| ----- |
| Data Collection Method | Data Collection Source | Formula |
| Document review | National Health Accounts & ministry of health data | Percentage of population coverage with different kind of insurance |

| Identity of Indicators to achieve Universal Health Coverage | | | |
| --- | --- | --- | --- |
| Dimension | | Axes | |
| Social Infrastructure & Sustainability  Financial and Economic Infrastructures  Health Status Service Delivery  Coverage Global Movements  Stewardship /governance | | Insurance Coverage | |
| Indicator Title | |
| 77- type of membership | |
| Indicator Definition | |
| ----- | |
| Data Collection Method | Data Collection Source | Formula | |
| Check list | Expert panel | ----- | Numerator |
| ----- | Denominator |

| Identity of Indicators to achieve Universal Health Coverage | | |
| --- | --- | --- |
| Dimension | | Axes |
| Social Infrastructure & Sustainability  Financial and Economic Infrastructures  Health Status Service Delivery  Coverage Global Movements  Stewardship /governance | | Insurance Coverage |
| Indicator Title |
| 78- Population coverage by different organizations |
| Indicator Definition |
| Total population covered by insurance and charity |
| Data Collection Method | Data Collection Source | Formula |
| Check list | Expert panel | Percentage population covered by insurance and charity |

| dentity of Indicators to achieve Universal Health Coverage | | |
| --- | --- | --- |
| Dimension | | Axes |
| Social Infrastructure & Sustainability  Financial and Economic Infrastructures  Health Status Service Delivery  Coverage Global Movements  Stewardship /governance | | Political leadership and Government’s responsibility |
| Indicator Title |
| 79- Multi Sectoral strategies such as health, education and labor sectors |
| Indicator Definition |
| ------- |
| Data Collection Method | Data Collection Source | Formula |
| Check list | Expert panel | Content analysis of participant response to related tools |

| Identity of Indicators to achieve Universal Health Coverage | | |
| --- | --- | --- |
| Dimension | | Axes |
| Social Infrastructure & Sustainability  Financial and Economic Infrastructures  Health Status Service Delivery  Coverage Global Movements  Stewardship /governance | | Political leadership and Government’s responsibility |
| Indicator Title |
| 81- Integrated Universal Health Coverage into its general development plans |
| Indicator Definition |
| ----- |
| Data Collection Method | Data Collection Source | Formula |
| Check list | Expert panel | Content analysis of participant response to related tools |

| Identity of Indicators to achieve Universal Health Coverage | | |
| --- | --- | --- |
| Dimension | | Axes |
| Social Infrastructure & Sustainability  Financial and Economic Infrastructures  Health Status Service Delivery  Coverage Global Movements  Stewardship /governance | | Political will and Commitment |
| Indicator Title |
| 82- Having a functional national Universal Health Coverage organization that promotes interaction among government, the private sector and civil society |
| Indicator Definition |
| ------ |
| Data Collection Method | Data Collection Source | Formula |
| Check list | Expert panel | Content analysis of participant response to related tools |

| Identity of Indicators to achieve Universal Health Coverage | | |
| --- | --- | --- |
| Dimension | | Axes |
| Social Infrastructure & Sustainability  Financial and Economic Infrastructures  Health Status Service Delivery  Coverage Global Movements  Stewardship /governance | | Political will and Commitment |
| Indicator Title |
| 83- Evaluation of the impact of Universal Health Coverage on its socio-economic status of planning purposes |
| Indicator Definition |
| ----------- |
| Data Collection Method | Data Collection Source | Formula |
| Check list | Expert panel | Content analysis of participant response to related tools |

| Identity of Indicators to achieve Universal Health Coverage | | |
| --- | --- | --- |
| Dimension | | Axes |
| Social Infrastructure & Sustainability  Financial and Economic Infrastructures  Health Status Service Delivery  Coverage Global Movements  Stewardship /governance | | Political will and Commitment |
| Indicator Title |
| 84- Having a general policy or strategy to promote information and education on universal health coverage |
| Indicator Definition |
| ----- |
| Data Collection Method | Data Collection Source | Formula |
| Check list | Expert panel | Content analysis of participant response to related tools |

| Identity of Indicators to achieve Universal Health Coverage | | |
| --- | --- | --- |
| Dimension | | Axes |
| Social Infrastructure & Sustainability  Financial and Economic Infrastructures  Health Status Service Delivery  Coverage Global Movements  Stewardship /governance | | Political will and Commitment |
| Indicator Title |
| 85- Having a policy or strategy to expand access, including among vulnerable groups, to essential services |
| Indicator Definition |
| ------ |
| Data Collection Method | Data Collection Source | Formula |
| Check list | Expert panel | Content analysis of participant response to related tools |

| Identity of Indicators to achieve Universal Health Coverage | | | |
| --- | --- | --- | --- |
| Dimension | | Axes | |
| Social Infrastructure & Sustainability  Financial and Economic Infrastructures  Health Status Service Delivery  Coverage Global Movements  Stewardship /governance | |  | |
| Indicator Title | |
| 86- Budget support as a share of GGE | |
| Indicator Definition | |
| ------ | |
| Data Collection Method | Data Collection Source | Formula | |
| Document review | Budget plan | Budget support as a share of GGE | Numerator |
| Total general government budget | Denominator |

| Identity of Indicators to achieve Universal Health Coverage | | | |
| --- | --- | --- | --- |
| Dimension | | Axes | |
| Social Infrastructure & Sustainability  Financial and Economic Infrastructures  Health Status Service Delivery  Coverage Global Movements  Stewardship /governance | |  | |
| Indicator Title | |
| 87- Sector budget support for health as a share of GGHE | |
| Indicator Definition | |
| ----- | |
| Data Collection Method | Data Collection Source | Formula | |
| Document review | Budget plan | Sector budget support for health as a share of GGHE | Numerator |
| Total general government health expenditure | Denominator |

| Identity of Indicators to achieve Universal Health Coverage | | | |
| --- | --- | --- | --- |
| Dimension | | Axes | |
| Social Infrastructure & Sustainability  Financial and Economic Infrastructures  Health Status Service Delivery  Coverage Global Movements  Stewardship /governance | |  | |
| Indicator Title | |
| 88- Total amount of loans for the health sector | |
| Indicator Definition | |
| The Total amount of loans consumed by the health sector are provided by the government (central and peripheral), by charities, by private donors and by users of health services | |
| Data Collection Method | Data Collection Source | Formula | |
| Document | Health sector database | Total amount of loans for the health sector | Numerator |
| - | Denominator |

1. Abiiro GA, De Allegri M. Universal health coverage from multiple perspectives: a synthesis of conceptual literature and global debates. BMC international health and human rights. 2015;15(1):17.

2. Abiiro GA, Mbera GB, De Allegri M. Gaps in universal health coverage in Malawi: a qualitative study in rural communities. BMC health services research. 2014;14(1):234.

3. Abiiro GA, McIntyre D. Universal financial protection through National Health Insurance: a stakeholder analysis of the proposed one-time premium payment policy in Ghana. Health policy and planning. 2012:czs059.

4. Adams AM, Ahmed T, El Arifeen S, Evans TG, Huda T, Reichenbach L. Innovation for universal health coverage in Bangladesh: a call to action. The Lancet. 2014;382(9910):2104-11.

5. Adebayo EF, Uthman OA, Wiysonge CS, Stern EA, Lamont KT, Ataguba JE. A systematic review of factors that affect uptake of community-based health insurance in low-income and middle-income countries. BMC health services research. 2015;15(1):1.

6. Aguilera X, Castillo-Laborde C, Najera-De Ferrari M, Delgado I, Ibañez C. Monitoring and evaluating progress towards universal health coverage in Chile. PLoS medicine. 2014;11(9):e1001676.

7. Ahmed S, Annear PL, Phonvisay B, Phommavong C, de Oliveira Cruz V, Hammerich A, et al. Institutional design and organizational practice for universal coverage in lesser-developed countries: challenges facing the Lao PDR. Social Science & Medicine. 2013;96:250-7.

8. Alebachew A, Hatt L, Kukla M. Monitoring and evaluating progress towards universal health coverage in Ethiopia. PLoS medicine. 2014;11(9):e1001696.

9. Amporfu E. Equity of the premium of the Ghanaian national health insurance scheme and the implications for achieving universal coverage. International Journal for Equity in Health. 2013;12(1):1.

10. Anderson GF. Providing hospital services: the changing financial environment: Johns Hopkins University Press; 1989.

11. Ataguba JE, Day C, McIntyre D. Monitoring and evaluating progress towards universal health coverage in South Africa. PLoS Med. 2014;11(9):e1001686.

12. Atun R, Aydın S, Chakraborty S, Sümer S, Aran M, Gürol I, et al. Universal health coverage in Turkey: enhancement of equity. The Lancet. 2013;382(9886):65-99.

13. Atun R, De Andrade LOM, Almeida G, Cotlear D, Dmytraczenko T, Frenz P, et al. Health-system reform and universal health coverage in Latin America. The Lancet. 2015;385(9974):1230-47.

14. Balarajan Y, Selvaraj S, Subramanian S. Health care and equity in India. The Lancet. 2011;377(9764):505-15.

15. Bennett S, Ozawa S, Rao KD. Which path to universal health coverage? Perspectives on the World Health Report 2010. PLoS Med. 2010;7(11):e1001001.

16. Blumberg LJ, Holahan J, Weil A, Clemans-Cope L, Buettgens M, Blavin F, et al. Toward universal coverage in Massachusetts. INQUIRY: The Journal of Health Care Organization, Provision, and Financing. 2006;43(2):102-21.

17. Boerma T, Eozenou P, Evans D, Evans T, Kieny M-P, Wagstaff A. Monitoring progress towards universal health coverage at country and global levels. PLoS Med. 2014;11(9):e1001731.

18. Boerma T, AbouZahr C, Evans D, Evans T. Monitoring intervention coverage in the context of universal health coverage. PLoS medicine. 2014;11(9):e1001728.

19. Blanchet K, Gordon I, Gilbert CE, Wormald R, Awan H. How to achieve universal coverage of cataract surgical services in developing countries: lessons from systematic reviews of other services. Ophthalmic epidemiology. 2012;19(6):329-39.

20. Borgonovi E, Compagni A. Sustaining universal health coverage: the interaction of social, political, and economic sustainability. Value in Health. 2013;16(1):S34-S8.

21. Bredenkamp C, Evans T, Lagrada L, Langenbrunner J, Nachuk S, Palu T. Emerging challenges in implementing universal health coverage in Asia. Social Science & Medicine. 2015;145:243-8.

22. Campbell J, Buchan J, Cometto G, David B, Dussault G, Fogstad H, et al. Human resources for health and universal health coverage: fostering equity and effective coverage. Bulletin of the World Health Organization. 2013;91(11):853-63.

23. Cassiani SHDB. Strategy for universal access to health and universal health coverage and the contribution of the International Nursing Networks. Revista latino-americana de enfermagem. 2014;22(6):891-2.

24. Chuma J, Maina T. Catastrophic health care spending and impoverishment in Kenya. BMC health services research. 2012;12(1):413.

25. Chuma J, Maina T, Ataguba J. Does the distribution of health care benefits in Kenya meet the principles of universal coverage? BMC public health. 2012;12(1):20.

26. Coe G, de Beyer J. The imperative for health promotion in universal health coverage. Global Health: Science and Practice. 2014;2(1):10-22.

27. Cometto G, Witter S. Tackling health workforce challenges to universal health coverage: setting targets and measuring progress. Bulletin of the World Health Organization. 2013;91:881-5.

28. Curtis R, Neuschler E. Affording shared responsibility for universal coverage: Insights from California. Health Affairs. 2009;28(3):w417-w30.

29. Thomson S, Figueras J, Evetovits T, Jowett M, Mladovsky P, Maresso A, et al. Economic crisis, health systems and health in Europe: impact and implications for policy. 2014.

30. Davis K. Universal coverage in the United States: lessons from experience of the 20th century. Journal of Urban Health. 2001;78(1):46-58.

31. de Andrade LOM, Pellegrini Filho A, Solar O, Rígoli F, de Salazar LM, Serrate PC-F, et al. Social determinants of health, universal health coverage, and sustainable development: case studies from Latin American countries. The Lancet. 2015;385(9975):1343-51.

32. Devadasan N, Ghosh S, Nandraj S, Sundararaman T. Monitoring and evaluating progress towards universal health coverage in India. PLoS medicine. 2014;11(9):e1001697.

33. Chen B, Cammett M. Informal politics and inequity of access to health care in Lebanon. International journal for equity in health. 2012;11(1):23.

34. Duran A, Kutzin J, Menabde N. Universal coverage challenges require health system approaches; the case of India. Health policy. 2014;114(2-3):269-77.

35. Fattore G, Tediosi F. The importance of values in shaping how health systems governance and management can support universal health coverage. Value in Health. 2013;16(1):S19-S23.

36. Ferré F, de Belvis AG, Valerio L, Longhi S, Lazzari A, Fattore G, et al. Italy: health system review. 2014.

37. Knaul FM, Bhadelia A, Atun R, Frenk J. Achieving Effective Universal Health Coverage And Diagonal Approaches To Care For Chronic Illnesses. Health Affairs. 2015;34(9):1514-22.

38. Gilson L, Erasmus E, Borghi J, Macha J, Kamuzora P, Mtei G. Using stakeholder analysis to support moves towards universal coverage: lessons from the SHIELD project. Health policy and planning. 2012;27(suppl_1):i64-i76.

39. Govender V, Chersich MF, Harris B, Alaba O, Ataguba JE, Nxumalo N, et al. Moving towards universal coverage in South Africa? Lessons from a voluntary government insurance scheme. Global health action. 2013;6:19253.

40. Guinto RLLR, Curran UZ, Suphanchaimat R, Pocock NS. Universal health coverage in ‘One ASEAN’: are migrants included? Global health action. 2015;8(1):25749.

41. Gutiérrez JP, García-Saisó S, Dolci GF, Ávila MH. Effective access to health care in Mexico. BMC health services research. 2014;14(1):186.

42. Ha BT, Frizen S, Thi LM, Duong DT, Duc DM. Policy processes underpinning universal health insurance in Vietnam. Global health action. 2014;7.

43. Harris B, Goudge J, Ataguba JE, McIntyre D, Nxumalo N, Jikwana S, et al. Inequities in access to health care in South Africa. Journal of public health policy. 2011;32(1):S102-S23.

44. Higashi H, Khuong TA, Ngo AD, Hill PS. Population-level approaches to universal health coverage in resource-poor settings: lessons from tobacco control policy in Vietnam. MEDICC review. 2011;13(3):39-42.

45. Huda T, Khan JA, Ahsan KZ, Jamil K, El Arifeen S. Monitoring and evaluating progress towards universal health coverage in Bangladesh. PLoS medicine. 2014;11(9):e1001722.

46. Ibrahimipour H, Maleki M-R, Brown R, Gohari M, Karimi I, Dehnavieh R. A qualitative study of the difficulties in reaching sustainable universal health insurance coverage in Iran. Health policy and planning. 2011;26(6):485-95.

47. Hussein R. A Review of Realizing the Universal Health Coverage (UHC) Goals by 2030: Part 2-What is the Role of eHealth and Technology? Journal of medical systems. 2015;39(7):72.

48. Jacobs B, Bigdeli M, Annear PL, Van Damme W. Addressing access barriers to health services: an analytical framework for selecting appropriate interventions in low-income Asian countries. Health policy and planning. 2011;27(4):288-300.

49. Jindal AK. Universal health coverage: The way forward. Indian journal of public health. 2014;58(3):161.

50. Knaul FM, González-Pier E, Gómez-Dantés O, García-Junco D, Arreola-Ornelas H, Barraza-Lloréns M, et al. The quest for universal health coverage: achieving social protection for all in Mexico. The Lancet. 2012;380(9849):1259-79.

51. Kobayashi Y. Five decades of universal health insurance coverage in Japan: lessons and future challenges. Jpn Med Assoc J. 2009;52:263-8.

52. Kumar AS, Chen LC, Choudhury M, Ganju S, Mahajan V, Sinha A, et al. Financing health care for all: challenges and opportunities. The Lancet. 2011;377(9766):668-79.

53. Kwon S. Thirty years of national health insurance in South Korea: lessons for achieving universal health care coverage. Health policy and planning. 2008;24(1):63-71.

54. Lagomarsino G, Garabrant A, Adyas A, Muga R, Otoo N. Moving towards universal health coverage: health insurance reforms in nine developing countries in Africa and Asia. The Lancet. 2012;380(9845):933-43.

55. Kwon S. Health Care Financing in Asia: Key Issues and Challenges. Asia Pacific Journal of Public Health. 2011;23(5):651-61.

56. Leegwater A, Wong W, Avila C. A concise, health service coverage index for monitoring progress towards universal health coverage. BMC Health Services Research. 2015;15(1):230.

57. Lei HC. Considerations on fundamental issues in establishing a universal coverage system for health in China. Journal of Evidence-Based Medicine. 2008;1(1):37-40.

58. Li C, Yu X, Butler JRG, Yiengprugsawan V, Yu M. Moving towards universal health insurance in China: Performance, issues and lessons from Thailand. Social Science & Medicine. 2011;73(3):359-66.

59. Do N, Oh J, Lee J-S. Moving toward Universal Coverage of Health Insurance in Vietnam: Barriers, Facilitating Factors, and Lessons from Korea. J Korean Med Sci. 2014;29(7):919-25.

60. Marnani AB, ET, Bahadori M, Ramin, Ravangard, Pour JS. Challenges of a Large Health Insurance Organization in Iran: A Qualitative Study. International Journal of Collaborative Research on Internal Medicine & Public Health 2012;4(6).

61. Marten R, McIntyre D, Travassos C, Shishkin S, Longde W, Reddy S, et al. An assessment of progress towards universal health coverage in Brazil, Russia, India, China, and South Africa (BRICS). The Lancet. 2014;384(9960):2164-71.

62. McIntyre D, Ataguba JE. Modelling the affordability and distributional implications of future health care financing options in South Africa. Health Policy and Planning. 2012;27(suppl_1):i101-i12.

63. McIntyre D, Garshong B, Mtei G, Meheus F, Thiede M, Akazili J, et al. Beyond fragmentation and towards universal coverage: insights from Ghana, South Africa and the United Republic of Tanzania. Bulletin of the World Health Organization. 2008;86(11):871-6.

64. McIntyre D, Ranson MK, Aulakh BK, Honda A. Promoting universal financial protection: evidence from seven low-and middle-income countries on factors facilitating or hindering progress. Health research policy and systems. 2013;11(1):36.

65. McKee M, Balabanova D, Basu S, Ricciardi W, Stuckler D. Universal health coverage: a quest for all countries but under threat in some. Value in Health. 2013;16(1):S39-S45.

66. Mills A. Strategies to Achieve Universal Coverage: Are There Lessons from Middle Income Countries?: a Literature Review Commissioned by the Health Systems Knowledge Network: University of the Witwatersrand Centre for Health Policy; 2007.

67. Mills A, Ally M, Goudge J, Gyapong J, Mtei G. Progress towards universal coverage: the health systems of Ghana, South Africa and Tanzania. Health policy and planning. 2012;27(suppl_1):i4-i12.

68. Ng M, Fullman N, Dieleman JL, Flaxman AD, Murray CJL, Lim SS. Effective Coverage: A Metric for Monitoring Universal Health Coverage. PLOS Medicine. 2014;11(9):e1001730.

69. Nyandekwe M, Nzayirambaho M, Baptiste Kakoma J. Universal health coverage in Rwanda: dream or reality. The Pan African Medical Journal. 2014;17:232.

70. Nyandekwe M, Nzayirambaho M, Kakoma JB. Universal health coverage in Rwanda: dream or reality. The Pan African Medical Journal. 2014;17.

71. O'Connell T, Rasanathan K, Chopra M. What does universal health coverage mean? The Lancet. 2014;383(9913):277-9.

72. Okoroh JS, Chia V, Oliver EA, Dharmawardene M, Riviello R. Strengthening Health Systems of Developing Countries: Inclusion of Surgery in Universal Health Coverage. World journal of surgery. 2015;39(8):1867-74.

73. Onarheim KH, Taddesse M, Norheim OF, Abdullah M, Miljeteig I. Towards universal health coverage for reproductive health services in Ethiopia: two policy recommendations. International Journal for Equity in Health. 2015;14(1):86.

74. Patel V, Parikh R, Nandraj S, Balasubramaniam P, Narayan K, Paul VK, et al. Assuring health coverage for all in India. The Lancet. 2015;386(10011):2422-35.

75. Qingyue M, Shenglan T. Universal Health Care Coverage in China: Challenges and Opportunities. Procedia - Social and Behavioral Sciences. 2013;77:330-40.

76. Quick J, Jay J, Langer A. Improving women's health through universal health coverage. PLoS medicine. 2014;11(1):e1001580.

77. Rao KD, Petrosyan V, Araujo EC, McIntyre D. Progress towards universal health coverage in BRICS: translating economic growth into better health. Bulletin of the World Health Organization. 2014;92(6):429-35.

78. Rao M, Rao KD, Kumar AKS, Chatterjee M, Sundararaman T. Human resources for health in India. The Lancet. 2011;377(9765):587-98.

79. Reich MR, Harris J, Ikegami N, Maeda A, Cashin C, Araujo EC, et al. Moving towards universal health coverage: lessons from 11 country studies. The Lancet. 2016;387(10020):811-6.

80. Saksena P, Hsu J, Evans DB. Financial Risk Protection and Universal Health Coverage: Evidence and Measurement Challenges. PLOS Medicine. 2014;11(9):e1001701.

81. Saleh SS, Alameddine MS, Natafgi NM, Mataria A, Sabri B, Nasher J, et al. The path towards universal health coverage in the Arab uprising countries Tunisia, Egypt, Libya, and Yemen. The Lancet. 2014;383(9914):368-81.

82. Sarwal R. Reforming Central Government Health Scheme into a 'Universal Health Coverage' model. Natl Med J India. 2015;28(1):29-37.

83. Savedoff WD, de Ferranti D, Smith AL, Fan V. Political and economic aspects of the transition to universal health coverage. The Lancet. 2012;380(9845):924-32.

84. Simonstein F. Priorities in the Israeli health care system. Medicine, Health Care and Philosophy. 2013;16(3):341-7.

85. Building Blocks For Reform: Achieving Universal Coverage With Private And Public Group Health Insurance. Health Affairs. 2008;27(3):646-57.

86. Sekhri N, Savedoff W. Regulating private health insurance to serve the public interest: policy issues for developing countries. The International journal of health planning and management. 2006;21(4):357-92.

87. Shibuya K, Hashimoto H, Ikegami N, Nishi A, Tanimoto T, Miyata H, et al. Future of Japan's system of good health at low cost with equity: beyond universal coverage. The Lancet. 2011;378(9798):1265-73.

88. Somkotra T. Measurement and Explanation of Horizontal (In)Equity in Health Care Utilization Among Thais After Universal Coverage Policy Implementation. Asia Pacific Journal of Public Health. 2010;23(6):980-95.

89. Sousa A, Scheffler RM, Koyi G, Ngah SN, Abu-Agla A, M’kiambati HM, et al. Health labour market policies in support of universal health coverage: a comprehensive analysis in four African countries. Human Resources for Health. 2014;12(1):55.

90. Spaan E, Mathijssen J, Tromp N, McBain F, Have At, Baltussen R. The impact of health insurance in Africa and Asia: a systematic review. Bulletin of the World Health Organization. 2012;90(9):685-92.

91. Suraratdecha C, Saithanu S, Tangcharoensathien V. Is universal coverage a solution for disparities in health care?: Findings from three low-income provinces of Thailand. Health Policy. 2005;73(3):272-84.

92. Swanson JM. The Process of Finding Contraceptive Options. Western Journal of Nursing Research. 1988;10(4):492-503.

93. Tan KB, Tan WS, Bilger M, Ho CWL. Monitoring and Evaluating Progress towards Universal Health Coverage in Singapore. PLOS Medicine. 2014;11(9):e1001695.

94. Tang S, Tao J, Bekedam H. Controlling cost escalation of healthcare: making universal health coverage sustainable in China. BMC Public Health. 2012;12(1):S8.

95. Tangcharoensathien V, Limwattananon S, Patcharanarumol W, Thammatacharee J. Monitoring and evaluating progress towards universal health coverage in Thailand. PLoS Med. 2014;11(9):e1001726.

96. Tangcharoensathien V, Mills A, Palu T. Accelerating health equity: the key role of universal health coverage in the Sustainable Development Goals. BMC Medicine. 2015;13(1):101.

97. Limwattananon S, Tangcharoensathien V, Tisayaticom K, Boonyapaisarncharoen T, Prakongsai P. Why has the Universal Coverage Scheme in Thailand achieved a pro-poor public subsidy for health care? BMC Public Health. 2012;12(1):S6.

98. Tangcharoensathien V, Patcharanarumol W, Ir P, Aljunid SM, Mukti AG, Akkhavong K, et al. Health-financing reforms in southeast Asia: challenges in achieving universal coverage. The Lancet. 2011;377(9768):863-73.

99. Tangcharoensathien V, Pitayarangsarit S, Patcharanarumol W, Prakongsai P, Sumalee H, Tosanguan J, et al. Promoting universal financial protection: how the Thai universal coverage scheme was designed to ensure equity. Health Research Policy and Systems. 2013;11(1):25.

100. Titelman D, Cetrángolo O, Acosta OL. Universal health coverage in Latin American countries: how to improve solidarity-based schemes. The Lancet. 2015;385(9975):1359-63.

101. Tripathy RM. Public health challenges for universal health coverage. 2014.

102. Tulenko KaChwfuh-ccfftsBotWHOo, v. 91, n. 11 [Accessed 28 September 2018] , pp. 847-852. Available from: <<https://doi.org/10.2471/BLT.13.118745>>. ISSN 0042-9686. <https://doi.org/10.2471/BLT.13.118745>.

103. Uzochukwu B, Ughasoro MD, Etiaba E, Okwuosa C, Envuladu E, OE. O. Health care financing in Nigeria: Implications for

achieving universal health coverage. . Niger J Clin Pract. 2015;18:437-44.

104. Van Minh H, Pocock NS, Chaiyakunapruk N, Chhorvann C, Duc HA, Hanvoravongchai P, et al. Progress toward universal health coverage in ASEAN. Global health action. 2014;7(1):25856.

105. Vian T, Feeley FG, Domente S, Negruta A, Matei A, Habicht J. Barriers to universal health coverage in Republic of Moldova: a policy analysis of formal and informal out-of-pocket payments. BMC Health Services Research. 2015;15(1):319.

106. Victora CG, Hanson K, Bryce J, Vaughan JP. Achieving universal coverage with health interventions. The Lancet. 2004;364(9444):1541-8.

107. Vilcu I, Mathauer I. State budget transfers to Health Insurance Funds for universal health coverage: institutional design patterns and challenges of covering those outside the formal sector in Eastern European high-income countries. International Journal for Equity in Health. 2016;15(1):7.

108. Wagner AK, Quick JD, Ross-Degnan D. Quality use of medicines within universal health coverage: challenges and opportunities. BMC Health Services Research. 2014;14(1):357.

109. Wellstood K, Wilson K, Eyles J. ‘Reasonable access’ to primary care: assessing the role of individual and system characteristics. Health & Place. 2006;12(2):121-30.

110. Xiao N, Long Q, Tang X, Tang S. A community-based approach to non-communicable chronic disease management within a context of advancing universal health coverage in China: progress and challenges. BMC Public Health. 2014;14(2):S2.

111. Yasar GY, Ugurluoglu E. Can Turkey's general health insurance system achieve universal coverage? The International journal of health planning and management. 2011;26(3):282-95.

112. Yu H. Universal health insurance coverage for 1.3 billion people: What accounts for China's success? Health Policy. 2015;119(9):1145-52.

113. Zoidze A, Rukhazde N, Chkhatarashvili K, Gotsadze G. Promoting universal financial protection: health insurance for the poor in Georgia–A case study. Health Research Policy and Systems. 2013;11(1):1.

114. Fried ST, Khurshid A, Tarlton D, Webb D, Gloss S, Paz C, et al. Universal health coverage: necessary but not sufficient. Reproductive Health Matters. 2013;21(42):50-60.

115. Garcia-Subirats I, Vargas I, Mogollón-Pérez AS, De Paepe P, da Silva MRF, Unger JP, et al. Barriers in access to healthcare in countries with different health systems. A cross-sectional study in municipalities of central Colombia and north-eastern Brazil. Social science & medicine. 2014;106:204-13.

116. Knaul FM, González-Pier E, Gómez-Dantés O, García-Junco D, Arreola-Ornelas H, Barraza-Lloréns M, et al. The quest for universal health coverage: achieving social protection for all in Mexico. The Lancet. 2012;380(9849):1259-79.

117. Kutzin JHffucahspcaifpBotWHOo, v. 91, n. 8 [Accessed 28 September 2018] , pp. 602-611. Available from: <<https://doi.org/10.2471/BLT.12.113985>>. Epub 17 June 2013. ISSN 0042-9686. <https://doi.org/10.2471/BLT.12.113985>.

118. Pannarunothai S, Patmasiriwat D, Srithamrongsawat S. Universal health coverage in Thailand: ideas for reform and policy struggling. Health Policy. 2004;68(1):17-30.

119. Tejativaddhana P, Briggs D, Fraser J, Minichiello V, Cruickshank M. Identifying challenges and barriers in the delivery of primary healthcare at the district level: a study in one Thai province. The International journal of health planning and management. 2013;28(1):16-34.

120. Hatanaka T, Eguchi N, Deguchi M, Yazawa M, Ishii M. Study of Global Health Strategy Based on International Trends: —Promoting Universal Health Coverage Globally and Ensuring the Sustainability of Japan’s Universal Coverage of Health Insurance System: Problems and Proposals—(). Japan Medical Association Journal : JMAJ. 2015;58(3):78-101.

121. Akashi H, Osanai Y, Akashi R. Human resources for health development: toward realizing Universal Health Coverage in Japan. BioScience Trends. 2015;9(5):275-9.

122. Alkenbrack S, Jacobs B, Lindelow M. Achieving universal health coverage through voluntary insurance: what can we learn from the experience of Lao PDR? BMC health services research. 2013;13(1):521.

123. Chirwa ML, Kazanga I, Faedo G, Thomas S. Promoting universal financial protection: contracting faith-based health facilities to expand access – lessons learned from Malawi. Health Research Policy and Systems. 2013;11(1):27.

124. Amaya JL, Ruiz F, Trujillo AJ, Buttorff C. Identifying barriers to move to better health coverage: preferences for health insurance benefits among the rural poor population in La Guajira, Colombia. The International Journal of Health Planning and Management. 2014;31(1):126-38.

125. Damrongplasit K, Melnick G. Funding, coverage, and access under Thailand’s Universal Health Insurance Program: An update after ten years. Applied health economics and health policy. 2015;13(2):157-66.

126. Gorin S. Universal Health Care Coverage in the United States:Barriers, Prospects, and Implications. Health & Social Work. 1997;22(3):223-30.

127. Joarder T, Sarker M. Achieving Universal Health Coverage Through Community Empowerment: A Proposition for Bangladesh. Indian Journal of Community Medicine : Official Publication of Indian Association of Preventive & Social Medicine. 2014;39(3):129-31.

128. Mathauer I, Carrin G. The role of institutional design and organizational practice for health financing performance and universal coverage. Health Policy. 2011;99(3):183-92.

129. Reddy KS, Patel V, Jha P, Paul VK, Kumar AKS, Dandona L. Towards achievement of universal health care in India by 2020: a call to action. The Lancet. 2011;377(9767):760-8.

130. Scheil-Adlung XHwbfuhcasdBotWHOo, v. 91, n. 11 [Accessed 28 September 2018] , pp. 888. Available from: <<https://doi.org/10.2471/BLT.13.126953>>. ISSN 0042-9686. <https://doi.org/10.2471/BLT.13.126953>.

131. Singh Z. Universal Health Coverage for India by 2022: A Utopia or Reality? Indian Journal of Community Medicine : Official Publication of Indian Association of Preventive & Social Medicine. 2013;38(2):70-3.

132. Sun J, Zhang XT, Zhang Z, Hogerzeil HV. Achieving universal health coverage-the case of Zhuhai city. Journal of Evidence-Based Medicine. 2014;7(3):154-62.

133. Wahlster P, Scahill S, Lu CY, Babar Z-U-D. Barriers to access and use of high cost medicines: A review. Health Policy and Technology. 2015;4(3):191-214.

134. Wirtz VJ, Hogerzeil HV, Gray AL, Bigdeli M, de Joncheere CP, Ewen MA, et al. Essential medicines for universal health coverage. The Lancet. 2017;389(10067):403-76.

135. Carrin G, James C. Reaching universal coverage via social health insurance: key design features in the transition period. Geneva: World Health Organization. 2004;13.

136. Chemouni B. The political path to universal health coverage: Power, ideas and community-based health insurance in Rwanda. World Development. 2018;106:87-98.

137. Rahman MS, Rahman MM, Gilmour S, Swe KT, Krull Abe S, Shibuya K. Trends in, and projections of, indicators of universal health coverage in Bangladesh, 1995–2030: a Bayesian analysis of population-based household data. The Lancet Global Health. 2018;6(1):e84-e94.

138. Chang AY, Ogbuoji O, Atun R, Verguet S. Dynamic modeling approaches to characterize the functioning of health systems: A systematic review of the literature. Social Science & Medicine. 2017;194:160-7.

139. França VHd, Modena CM, Confalonieri UEC. A multiprofessional perspective on the principal barriers to universal health coverage and universal access to health in extremely poor territories: the contributions of nursing. Revista Latino-Americana de Enfermagem. 2016;24.

140. Bryant-Lukosius D, Valaitis R, Martin-Misener R, Donald F, Peña LM, Brousseau L. Advanced Practice Nursing: A Strategy for Achieving Universal Health Coverage and Universal Access to Health. Revista Latino-Americana de Enfermagem. 2017;25.

141. Asaria M, Ali S, Doran T, Ferguson B, Fleetcroft R, Goddard M, et al. How a universal health system reduces inequalities: lessons from England. Journal of Epidemiology and Community Health. 2016.

142. Whiting S DT, Postma S, de Lorenzo AJ, Aumua A. Moving towards Universal Health Coverage through the Development of Integrated Service Delivery Packages for Primary Health Care in the Solomon Islands. International Journal of Integrated Care. 2016;16(1):3. DOI: <http://doi.org/10.5334/ijic.2447>.

143. Alami R. Health Financing Systems, Health Equity and Universal Health Coverage in Arab Countries. Development and Change. 2017;48(1):146-79.

144. Prinja S, Bahuguna P, Gupta R, Sharma A, Rana SK, Kumar R. Coverage and Financial Risk Protection for Institutional Delivery: How Universal Is Provision of Maternal Health Care in India? PLOS ONE. 2015;10(9):e0137315.

145. Pisani E, Olivier Kok M, Nugroho K. Indonesia's road to universal health coverage: a political journey. Health Policy and Planning. 2017;32(2):267-76.

146. Khan JAM, Ahmed S, Evans TG. Catastrophic healthcare expenditure and poverty related to out-of-pocket payments for healthcare in Bangladesh—an estimation of financial risk protection of universal health coverage. Health Policy and Planning. 2017;32(8):1102-10.

147. Asante AD, Irava W, Limwattananon S, Hayen A, Martins J, Guinness L, et al. Financing for universal health coverage in small island states: evidence from the Fiji Islands. BMJ Global Health. 2017;2(2).

148. Baltussen R, Jansen MP, Bijlmakers L, Tromp N, Yamin AE, Norheim OF. Progressive realisation of universal health coverage: what are the required processes and evidence? BMJ Global Health. 2017;2(3).

149. Wagstaff A, Cotlear D, Eozenou PH-V, Buisman LR. Measuring progress towards universal health coverage: with an application to 24 developing countries. Oxford Review of Economic Policy. 2016;32(1):147-89.

150. Hallo De Wolf A, Toebes B. Assessing Private Sector Involvement in Health Care and Universal Health Coverage in Light of the Right to Health. Health and Human Rights. 2016;18(2):79-92.

151. Hsu Y-T, Yang C-H. Universal Coverage Scheme and out-of-pocket healthcare expenditure: evidence from Thailand. Journal of the Asia Pacific Economy. 2017;22(2):309-29.

152. Beattie A, Yates R, Noble DJ. Accelerating progress towards universal health coverage in Asia and Pacific: improving the future for women and children. BMJ Global Health. 2016;1(Suppl 2):i12.

153. Bloom G, Merrett GB, Wilkinson A, Lin V, Paulin S. Antimicrobial resistance and universal health coverage. BMJ Global Health. 2017;2(4).

154. Verguet S. Defining Pathways and Trade-offs Toward Universal Health Coverage: Comment on "Ethical Perspective: Five Unacceptable Trade-offs on the Path to Universal Health Coverage". International Journal of Health Policy and Management. 2016;5(7):445-7.

155. Verulava TaJ, Revaz and Barkalaia, Temur (2017) Introduction of universal health program in Georgia: Problems and Perspectives. Georgian Med News, 262 (1). pp. 116-120. ISSN 1512-0112.

156. Mehrolhassani MH, Najafi B, Yazdi Feyzabadi V, Abolhallaje M, Ramezanian M, Dehnavieh R, et al. A Review of the Health Financing Policies Towards Universal Health Coverage in Iran. irje. 2017;12(0):74-84.

157. Gupta RD, Shahabuddin ASM. Measuring Progress Toward Universal Health Coverage: Does the Monitoring Framework of Bangladesh Need Further Improvement? Cureus. 2018;10(1):e2041.

158. Evolution and patterns of global health financing 1995-2014: development assistance for health, and government, prepaid private, and out-of-pocket health spending in 184 countries. Lancet (London, England). 2017;389(10083):1981-2004.

159. R Reddock. (2017) Seven parameters for evaluating universal health coverage: Including supply- and- demand perspectives. International Journal of Healthcare Management 10:3 p-.

160. Agyepong IA, Abankwah DNY, Abroso A, Chun C, Dodoo JNO, Lee S, et al. The “Universal” in UHC and Ghana’s National Health Insurance Scheme: policy and implementation challenges and dilemmas of a lower middle income country. BMC Health Services Research. 2016;16(1):504.

161. Islam MR, Rahman MS, Islam Z, Nurs CZB, Sultana P, Rahman MM. Inequalities in financial risk protection in Bangladesh: an assessment of universal health coverage. International Journal for Equity in Health. 2017;16(1):59.

162. Wong YS, Allotey P, Reidpath DD. Sustainable development goals, universal health coverage and equity in health systems: the Orang Asli commons approach. Global Health, Epidemiology and Genomics. 2016;1:e12.

163. Suzana M, Walls H, Smith R, Hanefeld J. Achieving universal health coverage in small island states: could importing health services provide a solution? BMJ Global Health. 2018;3(1).

164. Aantjes C, Quinlan T, Bunders J. Towards universal health coverage in Zambia: impediments and opportunities. Development in Practice. 2016;26(3):298-307.

165. Tsevelvaanchig U, Narula IS, Gouda H, Hill PS. Regulating the for-profit private healthcare providers towards universal health coverage: A qualitative study of legal and organizational framework in Mongolia. The International Journal of Health Planning and Management. 2017;33(1):185-201.

166. Yassoub R, Alameddine M, Saleh S. The Path Toward Universal Health Coverage: Stakeholder Acceptability of a Primary Care Health Benefits Package in Lebanon. International Journal of Health Services. 2015;47(2):352-73.
